# Supplementary material for: [9]aneN3-based fluorescent receptors for metal ion sensing, featuring urea and amide functional groups
Source: Royal Society of Chemistry journal article supplement (doi:10.1039/c9dt00288j), 2019-01-01
Supplement: c9dt00288j1.pdf [file c9dt00288j1.pdf]

## [9]aneN<sub>3</sub>-based fluorescent receptors for metal ion sensing featuring urea and amide functional groups.

Alessandra Garau, Andrea Bencini, Alexander J. Blake, Claudia Caltagirone, Luca Conti, Francesco Isaia, Vito Lippolis, Riccardo Montis, Palma Mariani, Mariano Andrea Scorciapino.

### Electronic Supporting Information (ESI)

#### INDEX

1. Synthesis of 1,4,7-tris-(N-ethyl-N'-phenyl-2yl)-1,4,7-triazacyclononane (L1)
  2. Synthesis of 1,4,7-tris-(N-ethyl-N'-quinolin-2yl)-1,4,7-triazacyclononane (L2)
  3. Synthesis of 1,4,7-tris-(N-8-quinolinylacetamide)-1,4,7-triazacyclononane (L3)
  4. Synthesis of [ZnL1(Ac)](Ac) (1)
  5. Synthesis of [CuL1(Cl)](Cl) (2)
  6. Synthesis of [CuL3](NO<sub>3</sub>) (3)
- Table S1 The stability constants ( $K_a$ ,  $M^{-1}$ )<sup>a</sup> of 1:1 complexes of L1 and L2 with a variety of anionic guests
- Fig. S1 <sup>1</sup>H-NMR of L<sup>1</sup> with TBAF in DMSO-*d*<sub>6</sub>
- Fig. S2 <sup>1</sup>H-NMR of L<sup>1</sup> with TBAAcO in DMSO-*d*<sub>6</sub>
- Fig. S3 <sup>1</sup>H-NMR of L<sup>1</sup> with TBABzO in DMSO-*d*<sub>6</sub>
- Fig. S4 <sup>1</sup>H-NMR of L<sup>1</sup> with TBAH<sub>2</sub>PO<sub>4</sub> in DMSO-*d*<sub>6</sub>
- Fig. S5 <sup>1</sup>H-NMR of L<sup>1</sup> with TBACl in DMSO-*d*<sub>6</sub>
- Fig. S6 <sup>1</sup>H-NMR of L<sup>2</sup> with TBAAcO in DMSO-*d*<sub>6</sub>
- Fig. S7 <sup>1</sup>H-NMR of L<sup>2</sup> with TBABzO in DMSO-*d*<sub>6</sub>
- Fig. S8 <sup>1</sup>H-NMR of L<sup>2</sup> with TBAH<sub>2</sub>PO<sub>4</sub> in DMSO-*d*<sub>6</sub>
- Fig. S9 <sup>1</sup>H-NMR of L<sup>2</sup> with TBACl in DMSO-*d*<sub>6</sub>
- Fig. S10 Absorption spectra of L2 upon addition of increasing amounts of Cd<sup>2+</sup>
- Fig. S11 Absorption spectra of L2 in the presence of increasing amounts of Zn<sup>2+</sup>
- Fig. S12 Absorption spectra of L2 in the presence of increasing amounts of Pb<sup>2+</sup>
- Fig. S13 Absorption spectra of L2 in the presence of increasing amounts of Cu<sup>2+</sup>
- Fig. S14 Changes in the emission spectrum of L2 upon addition of increasing amounts of Cd<sup>2+</sup>
- Fig. S15 Changes in the emission spectrum of L2 upon addition of increasing amounts of Zn<sup>2+</sup>
- Fig. S16 Changes in the emission spectrum of L2 upon addition of increasing amounts of Pb<sup>2+</sup>
- Fig. S17 Changes in the emission spectrum of L2 upon addition of increasing amounts of Cu<sup>2+</sup>
- Fig. S18 Normalized fluorescent intensity versus molar ratio plot for ligand L2 upon addition of increasing amounts of Cd<sup>2+</sup>, Zn<sup>2+</sup>, Pb<sup>2+</sup> and Cu<sup>2+</sup> ions
- Fig. S19 Distribution diagram of the protonated species of L3
- Fig. S20 Distribution diagrams of the species formed by Hg<sup>2+</sup> with L3
- Fig. S21 Distribution diagrams of the species formed by Cu<sup>2+</sup> with L3
- Fig. S22 Distribution diagrams of the species formed by Cd<sup>2+</sup> with L3
- Fig. S23 Distribution diagrams of the species formed by Cd<sup>2+</sup> with L3
- Fig. S24 Superimposition of the fluorescence emission intensity at 505 nm with the distribution diagrams of the species formed by L3 in the presence of Zn<sup>2+</sup>
- Fig. S25 High and low frequency region of the <sup>1</sup>H-NMR spectra of L3 in the presence of different amounts of Zn<sup>2+</sup>
- Fig. S26 Conformers for L3 in the absence of any metal ion.
- Fig. S27 Conformers for L3 in the presence of Zn<sup>2+</sup>
- Fig. S28 ESI-MS spectrum of a solution of L3 and Zn<sup>2+</sup> at molar ratio Zn<sup>2+</sup>/L3 of 1.0
- Fig. S29 Low and high frequency regions of the <sup>1</sup>H-NMR spectra of L3 at different pH values
- Fig. S30 Low field and high field region of the <sup>1</sup>H-NMR spectra of L3 in the presence of different amounts of Hg<sup>2+</sup>
- Fig. S31 ESI-MS spectrum at molar ratio Hg<sup>2+</sup>/L3 of 1.0
- Fig. S32 <sup>1</sup>H-NMR spectra of a) solution of L3 and Zn<sup>2+</sup> at molar ratio Zn<sup>2+</sup>/L3 of 0.5, b) solution of L3 and Zn<sup>2+</sup> in 1:1 molar ratio and addition of 1 equiv. of Hg<sup>2+</sup> and c) solution of L3 and Hg<sup>2+</sup> at molar ratio Hg<sup>2+</sup>/L3 of 0.7.
- Fig. S33 ESI-MS spectrum of a solution of L3 and Zn<sup>2+</sup> in 1:1 molar ratio and addition of 1 equiv. of Hg<sup>2+</sup>
- Table S2 Summary of the basic crystallographic parameters for [ZnL1(Ac)](Ac) (1), [CuL1(Cl)](Cl)·H<sub>2</sub>O (2) and [CuL3](NO<sub>3</sub>) (3)
- Table S3 Selected Bond Distances (Å) and Angles (°) for [ZnL1(Ac)](Ac) (1), [CuL1(Cl)](Cl)·H<sub>2</sub>O (2) and [CuL3](NO<sub>3</sub>) (3)

1. Synthesis of 1,4,7-tris-(N-ethyl-N'-phenyl-2yl)-1,4,7-triazacyclononane (L1).

To a solution of 1,4,7-tris(2-aminoethyl)-1,4,7-triazacyclononane (0.30 g, 1.16 mmol) in 70 mL of dry  $\text{CH}_2\text{Cl}_2$  was added in 24 hours under reflux, phenyl-isocyanate (0.27 g, 3.5 mmol) in dry  $\text{CH}_2\text{Cl}_2$  (30 mL). The white solid was taken off, and the solvent was removed under reduced pressure. The residue was dissolved in  $\text{CH}_2\text{Cl}_2$  and washed with water. The organic phase was dried over  $\text{Na}_2\text{SO}_4$ , and the solvent removed under reduced pressure to obtain a colourless oil (0.45 g, 63% yield).  $^1\text{H-NMR}$  ( $\text{DMSO-}d_6$ , 400 MHz):  $\delta_{\text{H}}$  2.70-2.95 (m, 18H,  $\text{CH}_2\text{CH}_2\text{NCH}_2$ ,  $\text{NCH}_2\text{CH}_2\text{N}$ ), 3.14 (m, 6H,  $\text{CH}_2\text{CH}_2\text{NH}$ ), 6.39 (s, 3H, NH), 6.92 (t, 3H,  $J = 8.0$  Hz), 7.22 (t, 6H,  $J = 8.0$  Hz), 7.36 (d, 6H,  $J = 8.0$  Hz), 8.74 (s, 3H, NH). MS (ESI):  $m/z$  615 ( $[\text{C}_{33}\text{H}_{45}\text{N}_9\text{O}_3]^+$ ).

2. Synthesis of 1,4,7-tris-(N-ethyl-N'-quinolin-2yl)-1,4,7-triazacyclononane (L2).

To a solution of 1,4,7-tris(2-aminoethyl)-1,4,7-triazacyclononane (0.38 g, 1.47 mmol, 10 mL dry DMF) was added slowly quinolin-2-isocyanate (0.76 g, 4.41 mmol) in dry DMF (15 mL). The reaction mixture was stirred at room temperature for 48 hours under nitrogen, and the solvent was removed under reduced pressure. The residue was dissolved in  $\text{CH}_2\text{Cl}_2$  and washed with water. The organic phase was dried over  $\text{Na}_2\text{SO}_4$ , and the solvent removed under reduced pressure. The solid was crystallized with methanol to give a white solid (0.25 g, 22% yield). Anal. Found (Calcd) for  $\text{C}_{42}\text{H}_{48}\text{N}_{12}\text{O}_3$ : C, 66.0 (65.6); H, 6.5 (6.3); N, 21.5 (21.9%).  $^1\text{H-NMR}$  ( $\text{DMSO-}d_6$ , 400 MHz):  $\delta_{\text{H}}$  2.58-2.72 (m, 18H,  $\text{CH}_2\text{CH}_2\text{NCH}_2$ ,  $\text{NCH}_2\text{CH}_2\text{N}$ ), 3.20-3.25 (m, 6H,  $\text{CH}_2\text{CH}_2\text{NH}$ ), 7.31 (d, 6H,  $J = 8.0$  Hz), 7.34 (t, 3H,  $J = 8.0$  Hz), 7.75 (t, 3H,  $J = 8.0$  Hz), 8.15 (d, 6H,  $J = 8.0$  Hz), 8.70 (s, 3H, NH), 9.48 (s, 3H, NH). MS (ESI):  $m/z$  768 ( $[\text{C}_{42}\text{H}_{48}\text{N}_{12}\text{O}_3]^+$ ).

3. Synthesis of 1,4,7-tris-(N-8-quinolinylacetamide)-1,4,7-triazacyclononane (L3).

To a solution of 1,4,7-triazacyclononane (0.10 g, 0.77 mmol) and  $\text{K}_2\text{CO}_3$  (0.64 g, 4.6 mmol) was added 2-chloro-N-8-quinolinylacetamide (0.53 g, 2.4 mmol) in anhydrous acetonitrile (30 mL). The reaction mixture was heated at  $80^\circ\text{C}$  for 24 hours under nitrogen. The solid was filtered off, and the solvent was removed under reduced pressure. The residue was dissolved in  $\text{CH}_2\text{Cl}_2$  and washed with water. The organic phase was dried over  $\text{Na}_2\text{SO}_4$ , and the solvent removed under reduced pressure. The solid was washed overnight with  $\text{Et}_2\text{O}$  to give pale yellow solid (0.25 g, 47% yield). Anal. Found (Calcd) for  $\text{C}_{39}\text{H}_{39}\text{N}_9\text{O}_3$ : C, 68.3 (68.7); H, 5.6 (5.8); N, 18.2 (18.5%).  $^1\text{H-NMR}$  ( $\text{CDCl}_3$ , 500 MHz):  $\delta_{\text{H}}$  3.39 (s, 12H,  $\text{NCH}_2\text{CH}_2\text{N}$ ), 3.51 (s, 6H,  $\text{NCH}_2\text{CO}$ ), 7.43 (dd,  $J = 8.3, 4.1$  Hz, 3H), 7.54 (m, 6H), 8.20 (dd,  $J = 6.8, 1.5$  Hz, 3H), 8.71 (dd,  $J = 2.65, 1.5$  Hz, 3H), 8.74 (dd,  $J = 4.9, 1.95$  Hz, 3H), 11.19 (s, 3H, NH).  $^{13}\text{C-NMR}$  ( $\text{CDCl}_3$ , 100 MHz):  $\delta_{\text{C}}$  57.18 ( $\text{NCH}_2\text{CH}_2\text{N}$ ), 64.90 ( $\text{NCH}_2\text{CO}$ ), 116.53, 122.34, 122.50, 127.65, 128.77, 135.09, 136.95, 139.08, 149.23 (aromatic carbon), 170.36 (CO). ESI-MS:  $m/z$  682 ( $[\text{C}_{39}\text{H}_{39}\text{N}_9\text{O}_3]^+$ ).

4. Synthesis of  $[\text{ZnL1}(\text{Ac})](\text{Ac})$  (1).  $\text{Zn}(\text{Ac})_2$  (3.0 mg, 0.016 mmol) in MeCN (1 mL) was added to a solution of L1 (10.0 mg, 0.016 mmol) in MeCN (5 mL). The solution was stirred at room temperature for 2 hours and colourless crystals were obtained by diffusion of  $\text{Et}_2\text{O}$  vapour in the solution (60% yield). Anal. Found (Calcd) for  $\text{C}_{37}\text{H}_{51}\text{N}_9\text{O}_7\text{Zn}$ : C, 55.2 (55.6); H, 6.2 (6.4); N, 15.4 (15.8%).

5. Synthesis of  $[\text{CuL1}(\text{Cl})](\text{Cl})$  (2).  $\text{CuCl}_2$  (2.0 mg, 0.016 mmol) in MeCN (1 mL) was added to a solution of L1 (10.0 mg, 0.016 mmol) in MeCN (5 mL). The solution was stirred at room temperature for 2 hours and blue crystals were obtained by diffusion of  $\text{Et}_2\text{O}$  vapour in the solution (65% yield). Anal. Found (Calcd) for  $\text{C}_{33}\text{H}_{46}\text{Cl}_2\text{CuN}_9\text{O}_{3.5}$ : C, 51.8 (52.2); H, 6.2 (6.1); N, 16.2 (16.6%).

6. Synthesis of  $[\text{CuL3}](\text{NO}_3)$  (3).  $\text{Zn}(\text{NO}_3)_2 \cdot 6\text{H}_2\text{O}$  (4.0 mg, 0.015 mmol) in MeCN (1 mL) was added to a solution of L3 (10.0 mg, 0.015 mmol) in MeCN (5 mL). The solution was stirred at room temperature for 2 hours and light blue crystals were obtained by diffusion of  $\text{Et}_2\text{O}$  vapour in the solution (68% yield). Anal. Found (Calcd) for  $\text{C}_{39}\text{H}_{38}\text{CuN}_{10}\text{O}_6$ : C, 57.8 (58.1); H, 4.5 (4.7); N, 17.1 (17.4%).

Table S1. The stability constants ( $K_a$ ,  $M^{-1}$ )<sup>a</sup> of 1:1 complexes of L1 and L2 with a variety of anionic guests (added as TBA salts) at 298K in DMSO-*d*<sub>6</sub> as determined by following the NH resonance of the urea unit.

| Anion                                       | L1  | L2      |
|---------------------------------------------|-----|---------|
| H <sub>2</sub> PO <sub>4</sub> <sup>-</sup> | 173 | 32      |
| F <sup>-</sup>                              | 366 | deprot. |
| Cl <sup>-</sup>                             | 17  | <10     |
| AcO <sup>-</sup>                            | 67  | <10     |
| BzO <sup>-</sup>                            | 42  | 16      |

<sup>a</sup> Errors on association constants are ≤13% (L2 with H<sub>2</sub>PO<sub>4</sub><sup>-</sup> and AcO<sup>-</sup> 20% and 28%, respectively).

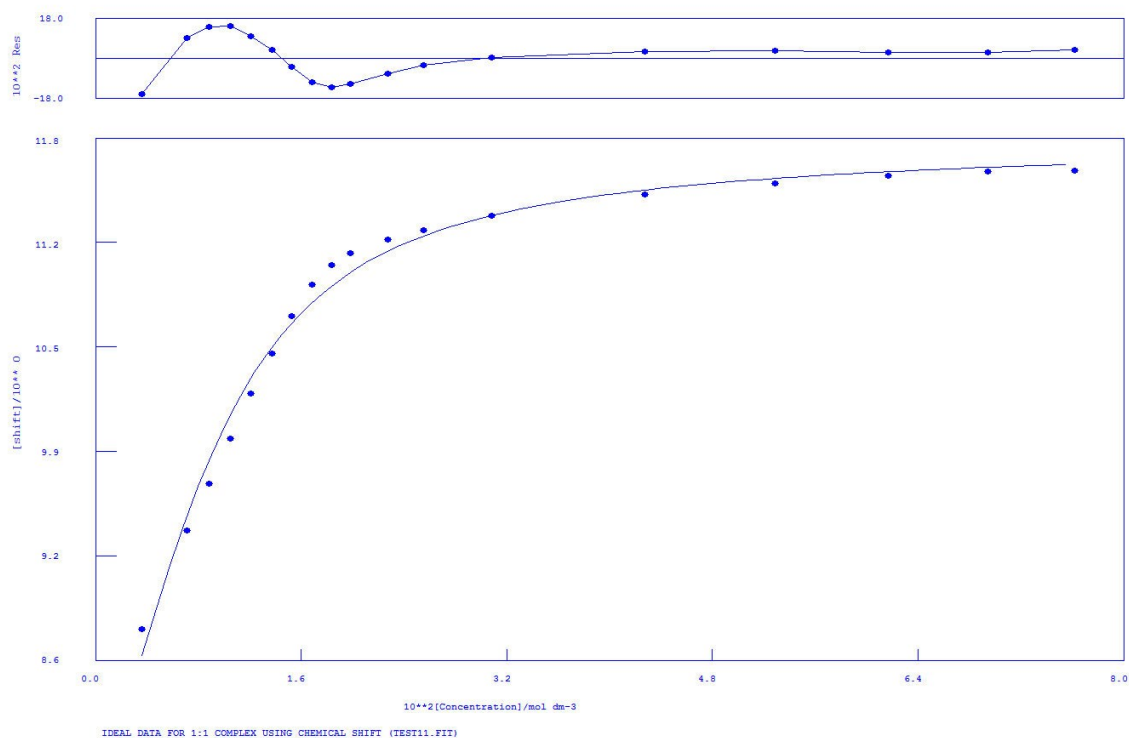

Calculations by WinEQNMR Version 1.20 by Michael J. Hynes  
Program run at 11:10:27 on 05/07/2012

IDEAL DATA FOR 1:1 COMPLEX USING CHEMICAL SHIFT (TEST11.FIT)

Reaction: M + L = ML

FILE: TEST11.FIT

IDEAL DATA: K1 = 63.091; DELTA M = 20.0; DELTA ML = 120.0

File prepared by M. J. Hynes, October 22 2000

NO. A PARAMETER DELTA ERROR CONDITION DESCRIPTION

1 1 3.65559E+02 2.000E-01 4.897E+01 8.457E+00 K1  
2 1 7.54357E+00 2.000E-01 1.343E-01 3.312E+00 SHIFT M  
3 1 1.18062E+01 1.000E+00 6.314E-02 4.603E+00 SHIFT ML

Figure S1. <sup>1</sup>H-NMR of L<sup>1</sup> with TBAF in DMSO-*d*<sub>6</sub>. The fitting has been obtained following the most downfield shifted NH proton.

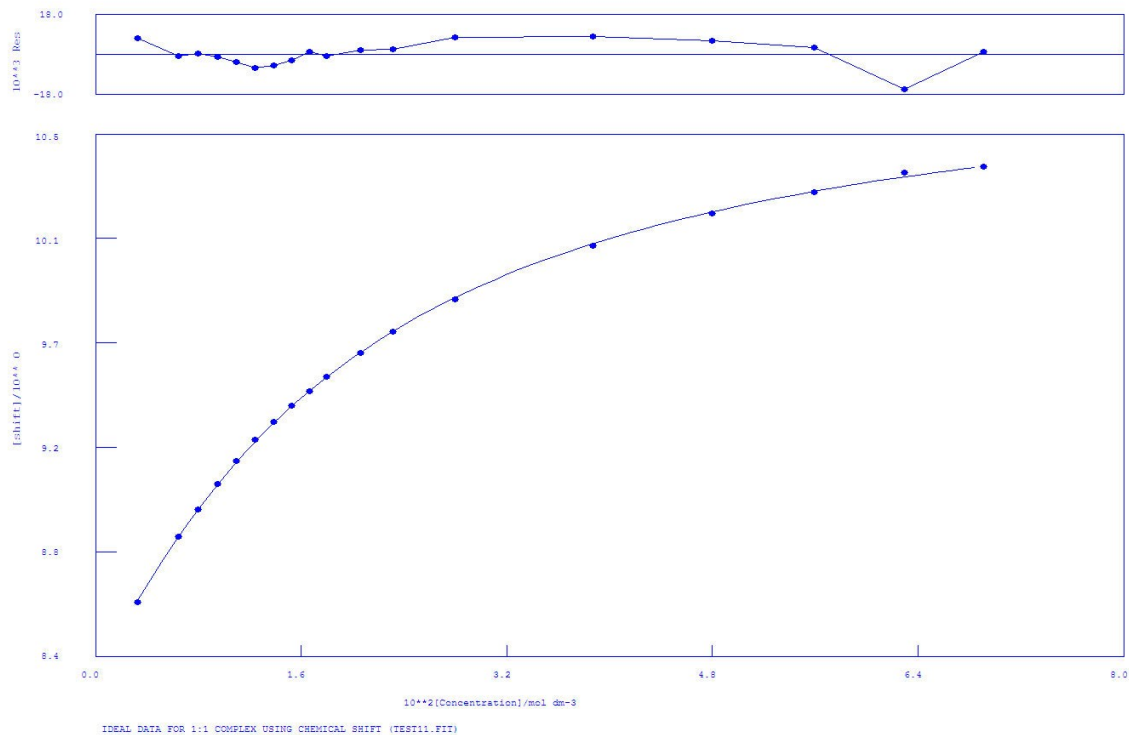

Calculations by WinEQNMR Version 1.20 by Michael J. Hynes  
 Program run at 09:06:19 on 03/11/2010

IDEAL DATA FOR 1:1 COMPLEX USING CHEMICAL SHIFT (TEST11.FIT)

Reaction:  $M + L = ML$

FILE: TEST11.FIT

IDEAL DATA:  $K_1 = 63.091$ ;  $\Delta M = 20.0$ ;  $\Delta ML = 120.0$

File prepared by M. J. Hynes, October 22 2000

NO. A PARAMETER DELTA ERROR CONDITION DESCRIPTION

|   |   |             |           |           |           |          |
|---|---|-------------|-----------|-----------|-----------|----------|
| 1 | 1 | 6.67075E+01 | 2.000E-01 | 1.142E+00 | 3.082E+01 | K1       |
| 2 | 1 | 8.30769E+00 | 2.000E-01 | 7.169E-03 | 7.386E+00 | SHIFT M  |
| 3 | 1 | 1.08720E+01 | 1.000E+00 | 1.052E-02 | 1.480E+01 | SHIFT ML |

Figure S2.  $^1\text{H-NMR}$  of  $\text{L}^1$  with TBAAcO in  $\text{DMSO-}d_6$ . The fitting has been obtained following the most downfield shifted NH proton.

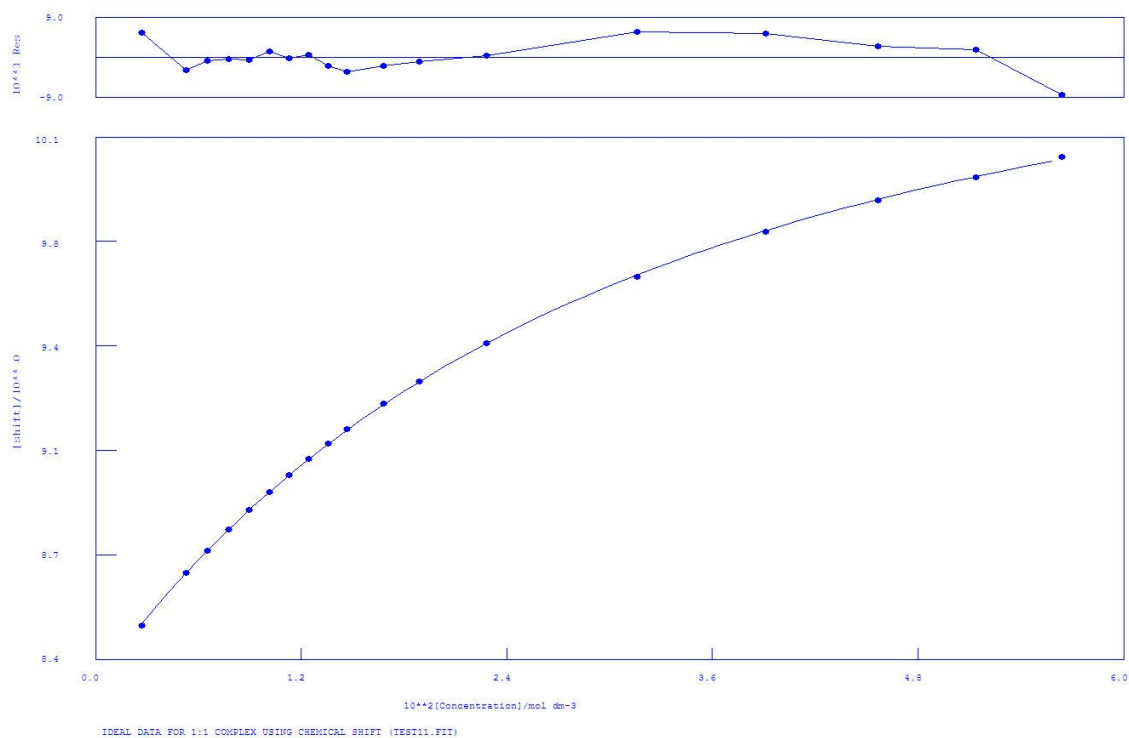

Calculations by WinEQNMR Version 1.20 by Michael J. Hynes  
 Program run at 10:35:12 on 03/11/2010

IDEAL DATA FOR 1:1 COMPLEX USING CHEMICAL SHIFT (TEST11.FIT)

Reaction:  $M + L = ML$

FILE: TEST11.FIT

IDEAL DATA:  $K_1 = 63.091$ ;  $\Delta M = 20.0$ ;  $\Delta ML = 120.0$

File prepared by M. J. Hynes, October 22 2000

NO. A PARAMETER DELTA ERROR CONDITION DESCRIPTION

|   |   |             |           |           |           |          |
|---|---|-------------|-----------|-----------|-----------|----------|
| 1 | 1 | 4.21288E+01 | 2.000E-01 | 6.213E-01 | 5.856E+01 | K1       |
| 2 | 1 | 8.32517E+00 | 2.000E-01 | 3.636E-03 | 7.757E+00 | SHIFT M  |
| 3 | 1 | 1.08375E+01 | 1.000E+00 | 1.260E-02 | 3.444E+01 | SHIFT ML |

Figure S3.  $^1\text{H-NMR}$  of  $\text{L}^1$  with TBABzO in  $\text{DMSO-}d_6$ . The fitting has been obtained following the most downfield shifted NH proton.

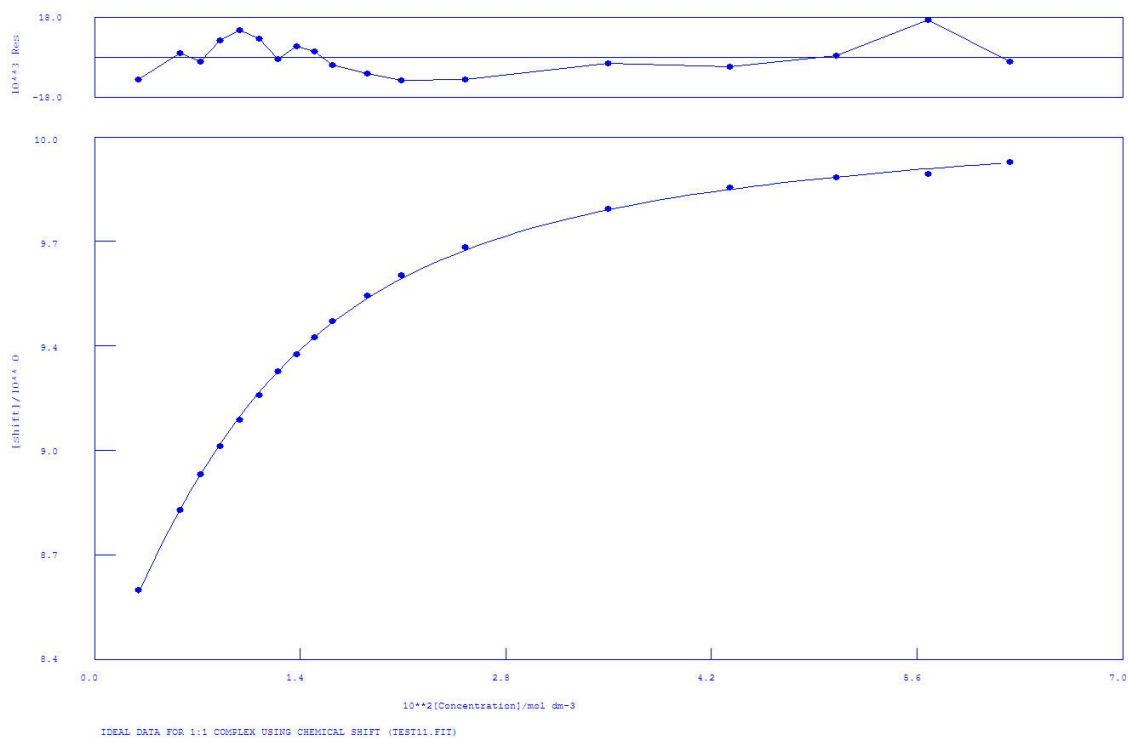

Calculations by WinEQNMR Version 1.20 by Michael J. Hynes  
 Program run at 10:09:42 on 03/11/2010

IDEAL DATA FOR 1:1 COMPLEX USING CHEMICAL SHIFT (TEST11.FIT)

Reaction:  $M + L = ML$

FILE: TEST11.FIT

IDEAL DATA:  $K_1 = 63.091$ ;  $\Delta M = 20.0$ ;  $\Delta ML = 120.0$

File prepared by M. J. Hynes, October 22 2000

NO. A PARAMETER DELTA ERROR CONDITION DESCRIPTION

|   |   |             |           |           |           |          |
|---|---|-------------|-----------|-----------|-----------|----------|
| 1 | 1 | 1.72872E+02 | 2.000E-01 | 4.654E+00 | 1.522E+01 | K1       |
| 2 | 1 | 8.28291E+00 | 2.000E-01 | 9.750E-03 | 4.813E+00 | SHIFT M  |
| 3 | 1 | 1.00970E+01 | 1.000E+00 | 8.105E-03 | 7.562E+00 | SHIFT ML |

Figure S4.  $^1\text{H-NMR}$  of  $\text{L}^1$  with  $\text{TBAH}_2\text{PO}_4$  in  $\text{DMSO-}d_6$ . The fitting has been obtained following the most downfield shifted NH proton.

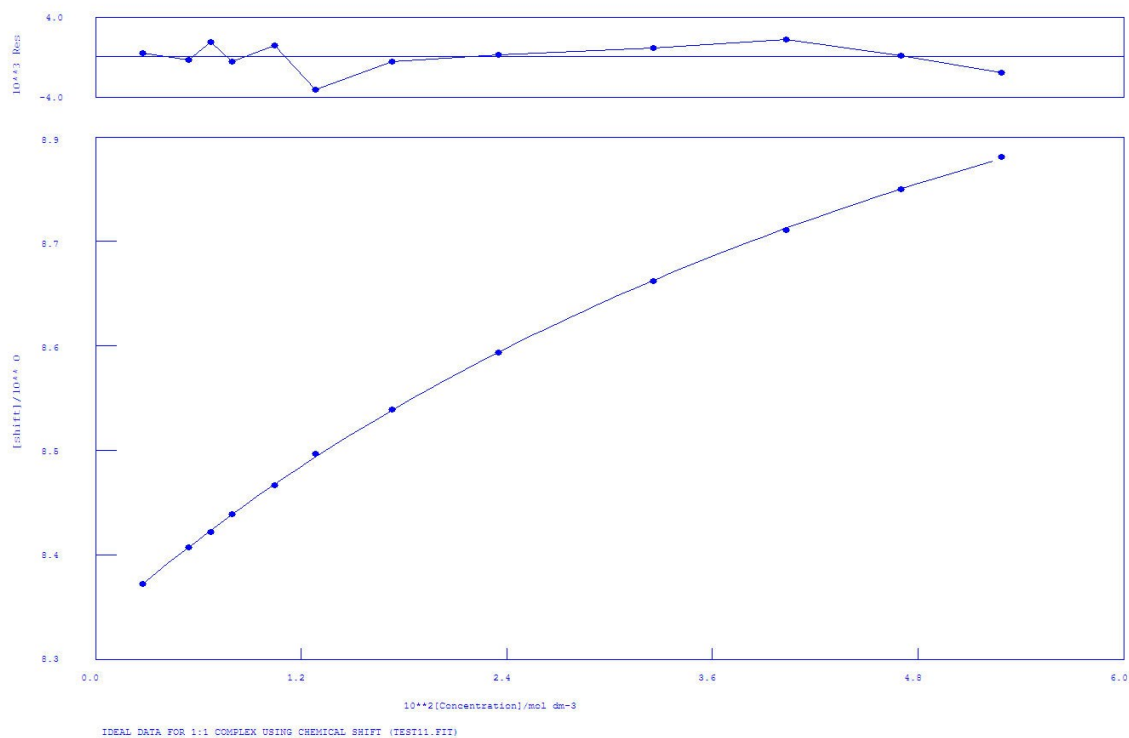

Calculations by WinEQNMR Version 1.20 by Michael J. Hynes  
 Program run at 09:50:07 on 03/15/2010

IDEAL DATA FOR 1:1 COMPLEX USING CHEMICAL SHIFT (TEST11.FIT)

Reaction:  $M + L = ML$

FILE: TEST11.FIT

IDEAL DATA:  $K_1 = 63.091$ ;  $\Delta M = 20.0$ ;  $\Delta ML = 120.0$

File prepared by M. J. Hynes, October 22 2000

NO. A PARAMETER DELTA ERROR CONDITION DESCRIPTION

|   |             |           |           |           |          |
|---|-------------|-----------|-----------|-----------|----------|
| 1 | 1.73529E+01 | 2.000E-01 | 6.043E-01 | 1.738E+02 | K1       |
| 2 | 8.33678E+00 | 2.000E-01 | 1.453E-03 | 6.549E+00 | SHIFT M  |
| 3 | 9.40885E+00 | 1.000E+00 | 1.951E-02 | 1.351E+02 | SHIFT ML |

Figure S5.  $^1\text{H-NMR}$  of  $\text{L}^1$  with TBACl in  $\text{DMSO-}d_6$ . The fitting has been obtained following the most downfield shifted NH proton.

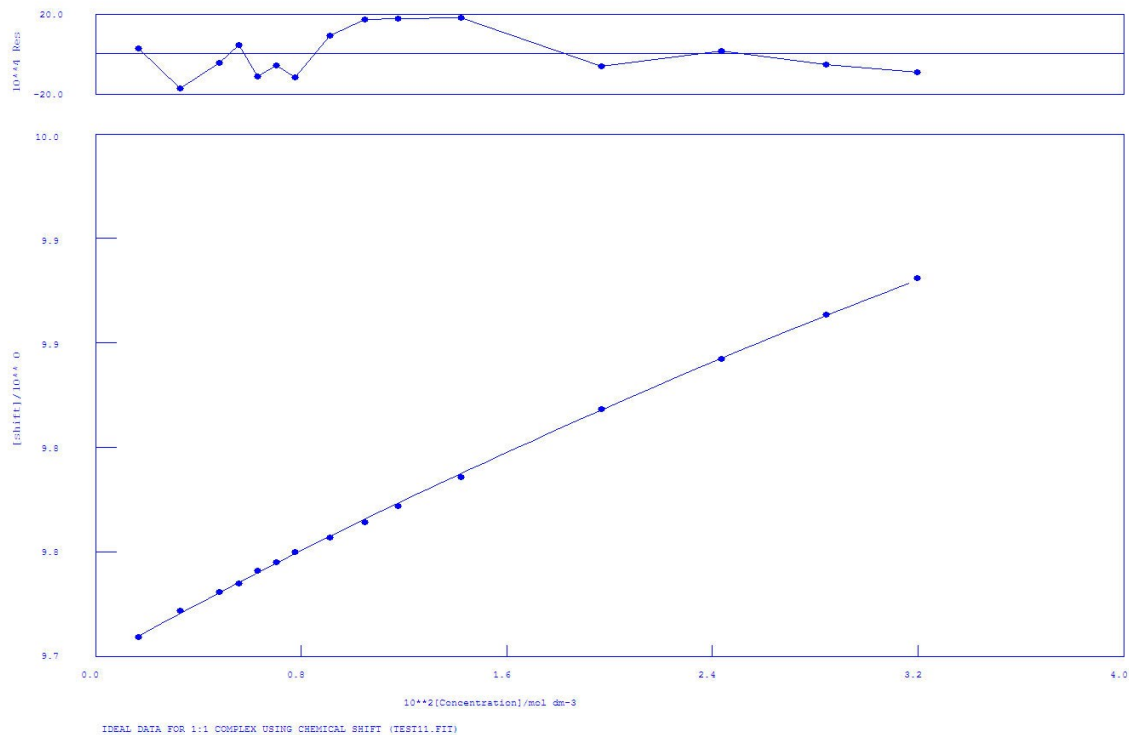

Calculations by WinEQNMR Version 1.20 by Michael J. Hynes  
 Program run at 09:26:23 on 07/09/2012

IDEAL DATA FOR 1:1 COMPLEX USING CHEMICAL SHIFT (TEST11.FIT)

Reaction:  $M + L = ML$

FILE: TEST11.FIT

IDEAL DATA:  $K_1 = 63.091$ ;  $\Delta M = 20.0$ ;  $\Delta ML = 120.0$

File prepared by M. J. Hynes, October 22 2000

NO. A PARAMETER DELTA ERROR CONDITION DESCRIPTION

|   |   |             |           |           |           |          |
|---|---|-------------|-----------|-----------|-----------|----------|
| 1 | 1 | 6.60500E+00 | 2.000E-01 | 7.796E-01 | 1.192E+03 | K1       |
| 2 | 1 | 9.69753E+00 | 2.000E-01 | 1.028E-03 | 9.114E+00 | SHIFT M  |
| 3 | 1 | 1.09741E+01 | 1.000E+00 | 1.198E-01 | 1.057E+03 | SHIFT ML |

Figure S6.  $^1\text{H-NMR}$  of  $\text{L}^2$  with TBAAcO in  $\text{DMSO-}d_6$ . The fitting has been obtained following the most downfield shifted NH proton.



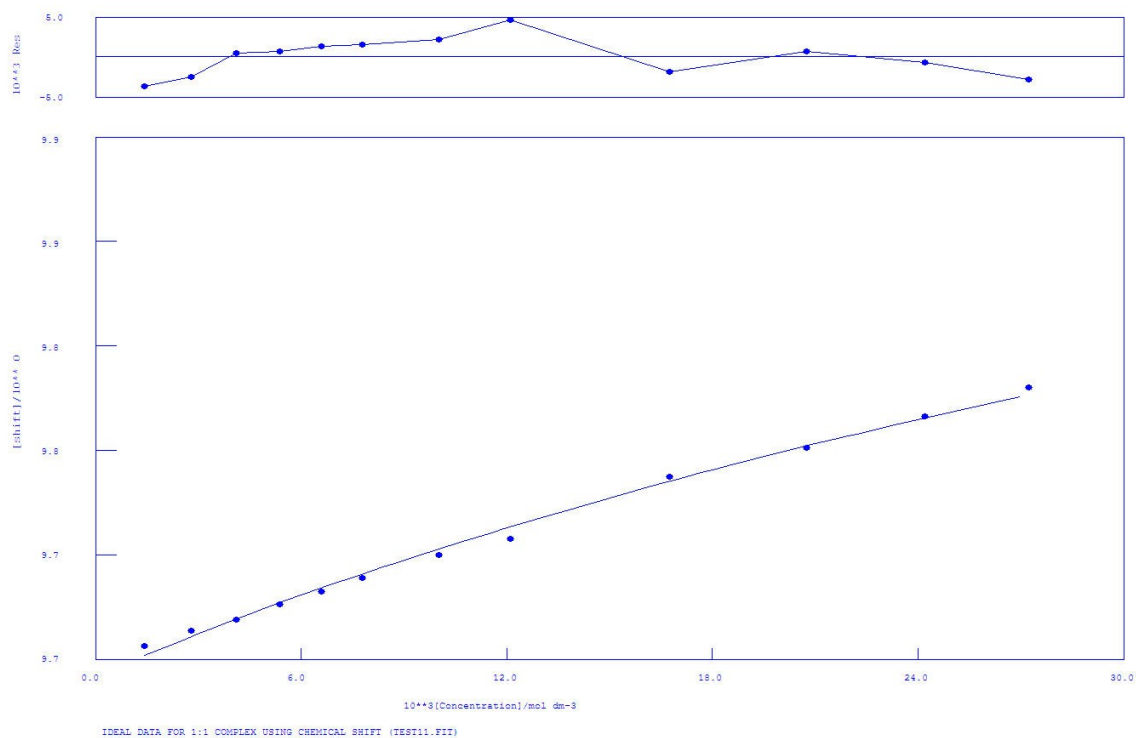

Calculations by WinEQNMR Version 1.20 by Michael J. Hynes  
 Program run at 09:33:01 on 07/09/2012

IDEAL DATA FOR 1:1 COMPLEX USING CHEMICAL SHIFT (TEST11.FIT)

Reaction:  $M + L = ML$

FILE: TEST11.FIT

IDEAL DATA:  $K_1 = 63.091$ ;  $\Delta M = 20.0$ ;  $\Delta ML = 120.0$

File prepared by M. J. Hynes, October 22 2000

NO. A PARAMETER DELTA ERROR CONDITION DESCRIPTION

|   |   |             |           |           |           |          |
|---|---|-------------|-----------|-----------|-----------|----------|
| 1 | 1 | 1.63545E+01 | 2.000E-01 | 4.516E+00 | 2.587E+02 | K1       |
| 2 | 1 | 9.69360E+00 | 2.000E-01 | 1.932E-03 | 4.837E+00 | SHIFT M  |
| 3 | 1 | 1.00531E+01 | 1.000E+00 | 6.779E-02 | 2.233E+02 | SHIFT ML |

Figure S7.  $^1\text{H-NMR}$  of  $\text{L}^2$  with TBABzO in  $\text{DMSO-}d_6$ . The fitting has been obtained following the most downfield shifted NH proton.

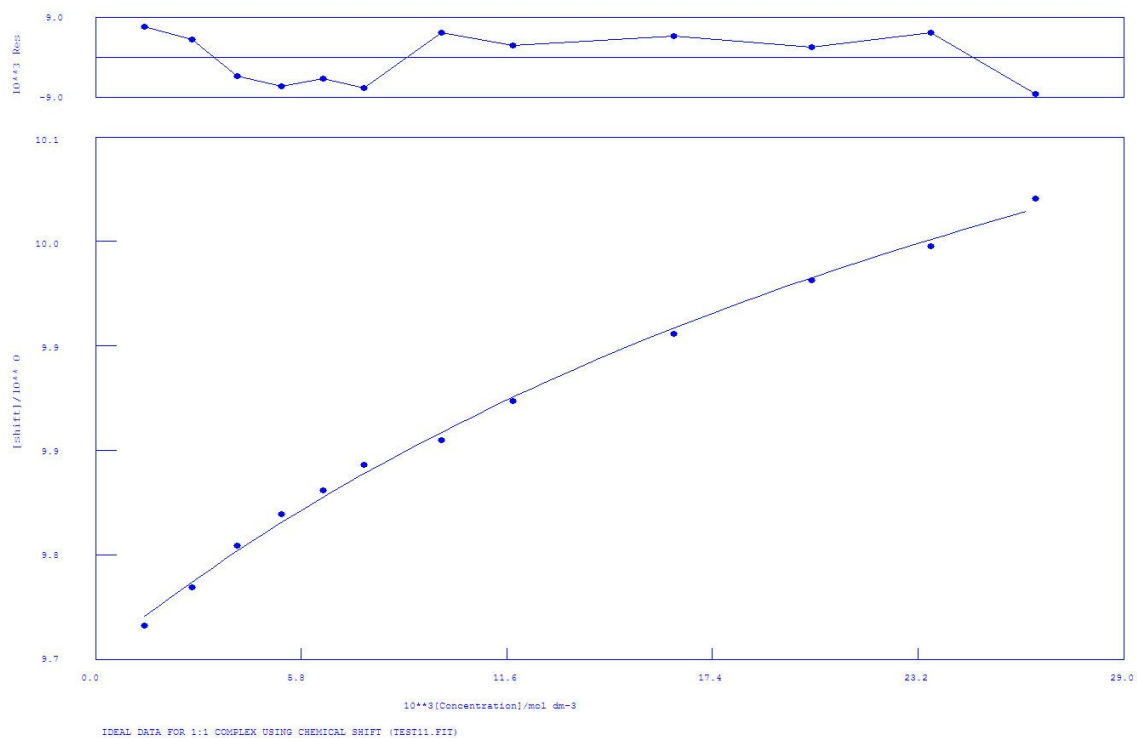

Calculations by WinEQNMR Version 1.20 by Michael J. Hynes  
 Program run at 09:39:45 on 07/09/2012

IDEAL DATA FOR 1:1 COMPLEX USING CHEMICAL SHIFT (TEST11.FIT)

Reaction:  $M + L = ML$

FILE: TEST11.FIT

IDEAL DATA:  $K_1 = 63.091$ ;  $\Delta M = 20.0$ ;  $\Delta ML = 120.0$

File prepared by M. J. Hynes, October 22 2000

NO. A PARAMETER DELTA ERROR CONDITION DESCRIPTION

|   |   |             |           |           |           |          |
|---|---|-------------|-----------|-----------|-----------|----------|
| 1 | 1 | 3.21314E+01 | 2.000E-01 | 6.465E+00 | 1.915E+02 | K1       |
| 2 | 1 | 9.70390E+00 | 2.000E-01 | 6.141E-03 | 7.097E+00 | SHIFT M  |
| 3 | 1 | 1.04780E+01 | 1.000E+00 | 8.593E-02 | 1.483E+02 | SHIFT ML |

Figure S8.  $^1\text{H-NMR}$  of  $\text{L}^2$  with  $\text{TBAH}_2\text{PO}_4$  in  $\text{DMSO-}d_6$ . The fitting has been obtained following the most downfield shifted NH proton.

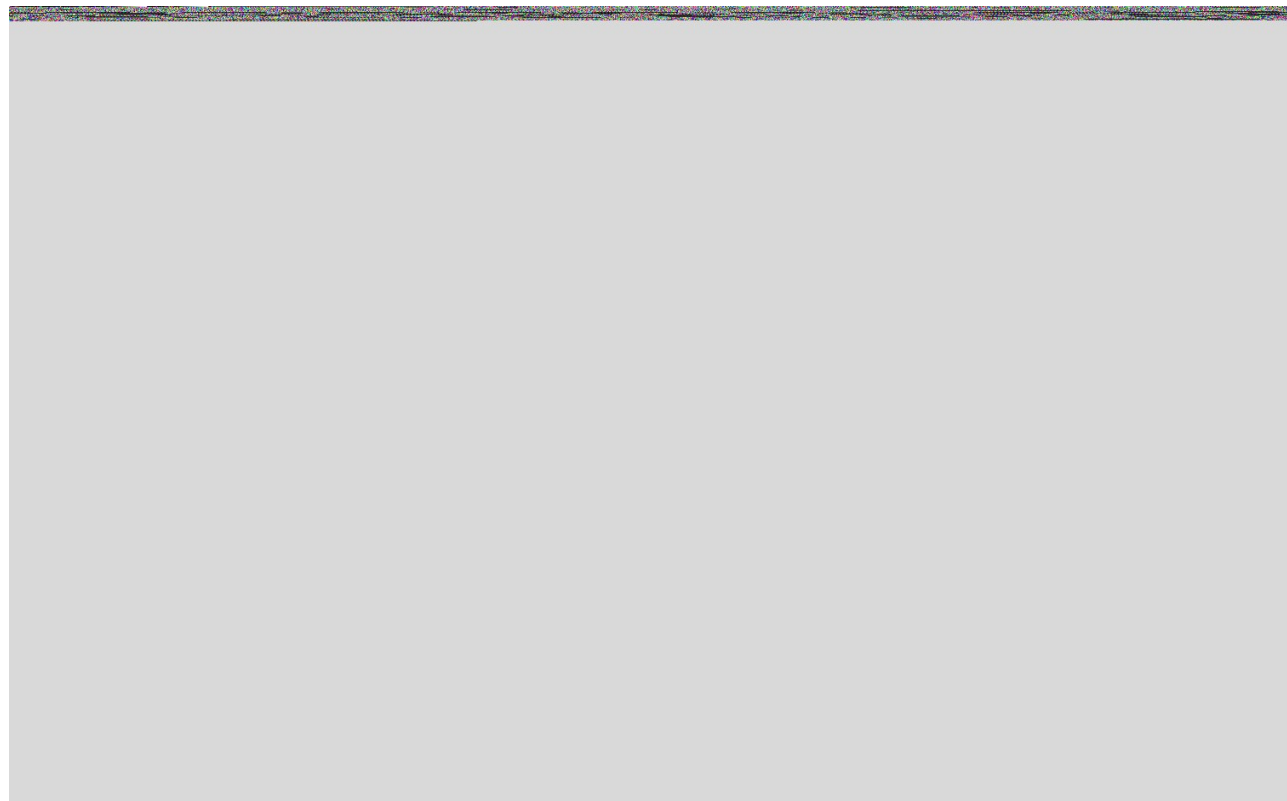

Calculations by WinEQNMR Version 1.20 by Michael J. Hynes  
Program run at 09:52:48 on 07/09/2012

IDEAL DATA FOR 1:1 COMPLEX USING CHEMICAL SHIFT (TEST11.FIT)

Reaction: M + L = ML

FILE: TEST11.FIT

IDEAL DATA: K1 = 63.091; DELTA M = 20.0; DELTA ML = 120.0

File prepared by M. J. Hynes, October 22 2000

NO. A PARAMETER DELTA ERROR CONDITION DESCRIPTION

|   |   |             |           |           |           |          |
|---|---|-------------|-----------|-----------|-----------|----------|
| 1 | 1 | 4.60500E+00 | 2.000E-01 | 2.796E-01 | 1.192E+03 | K1       |
| 2 | 1 | 9.69753E+00 | 2.000E-01 | 1.028E-03 | 9.114E+00 | SHIFT M  |
| 3 | 1 | 1.09741E+01 | 1.000E+00 | 1.198E-01 | 1.057E+03 | SHIFT ML |

Figure S9.  $^1\text{H}$ -NMR of  $\text{L}^2$  with TBACl in  $\text{DMSO}-d_6$ . The fitting has been obtained following the most downfield shifted NH proton.

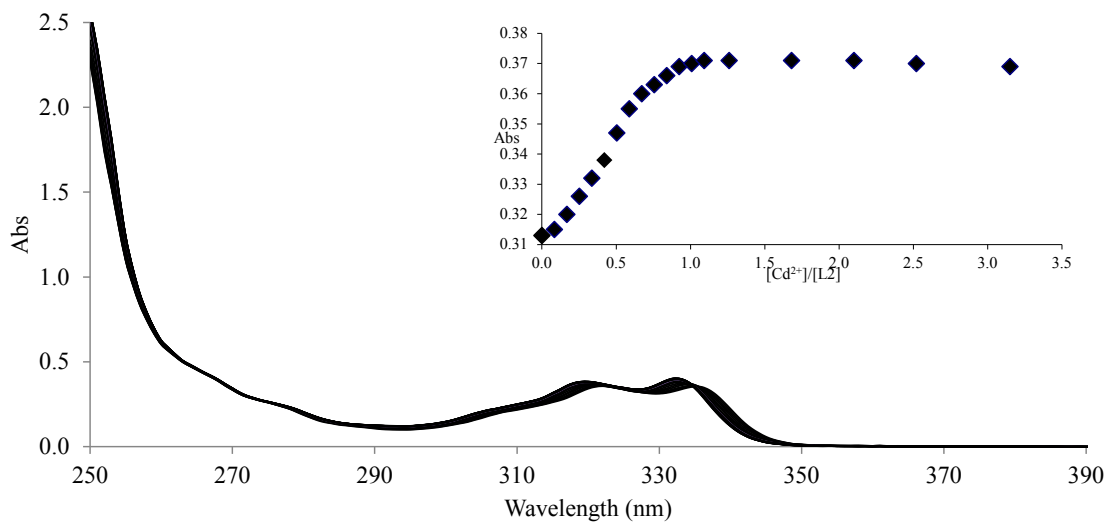

Figure S10. Absorption spectra of L2 upon addition of increasing amounts of Cd<sup>2+</sup> (inset: absorbance values measured at 335 nm versus [Cd<sup>2+</sup>]/[L2] molar ratio, [L2] = 1.99·10<sup>-5</sup> M, 25°C).

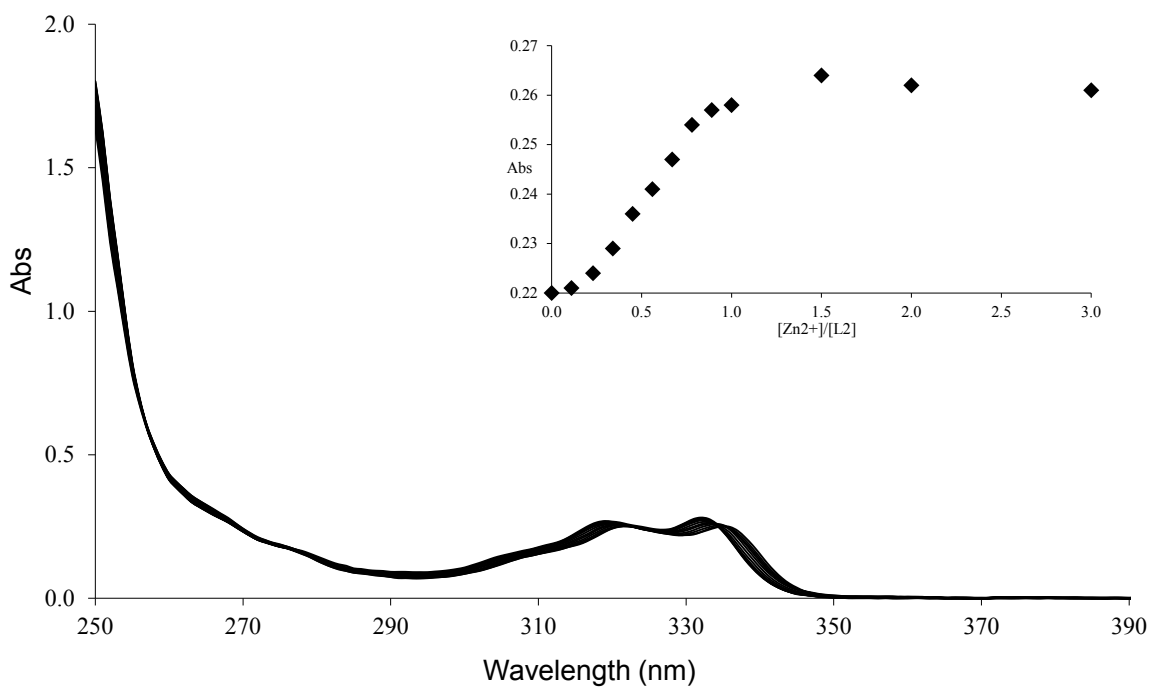

Figure S11. Absorption spectra of L2 in the presence of increasing amounts of Zn<sup>2+</sup> (inset: absorbance values measured at 335 nm versus [Zn<sup>2+</sup>]/[L2] molar ratio, [L2] = 1.99·10<sup>-5</sup> M, 25°C).

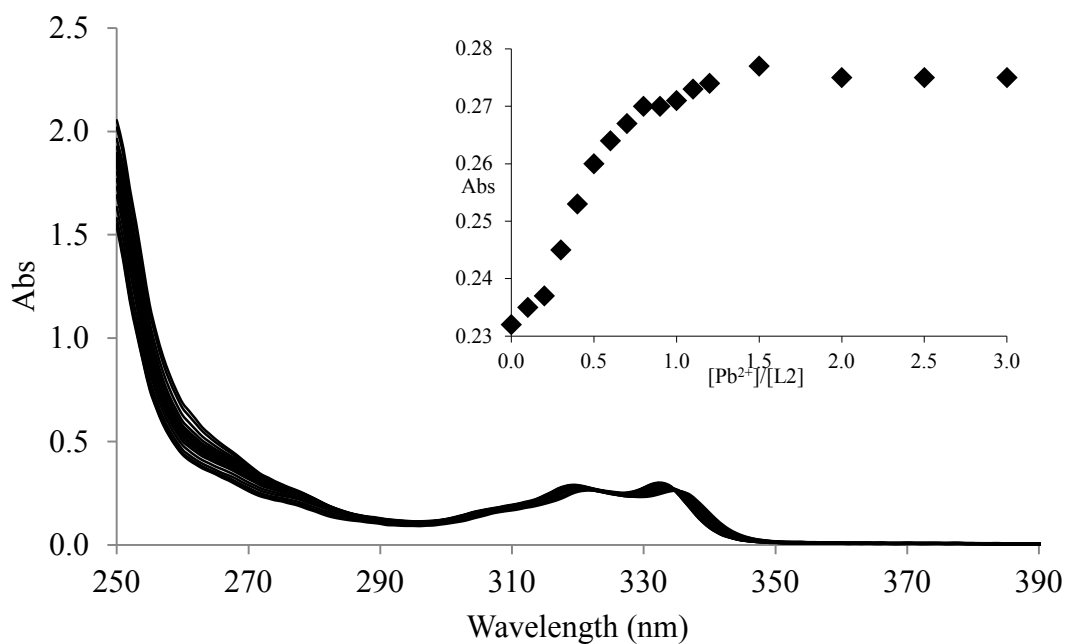

Figure S12. Absorption spectra of L2 in the presence of increasing amounts of Pb<sup>2+</sup> (inset: absorbance values measured at 335 nm versus [Pb<sup>2+</sup>]/[L2] molar ratio, [L2] = 1.99·10<sup>-5</sup> M, 25°C).

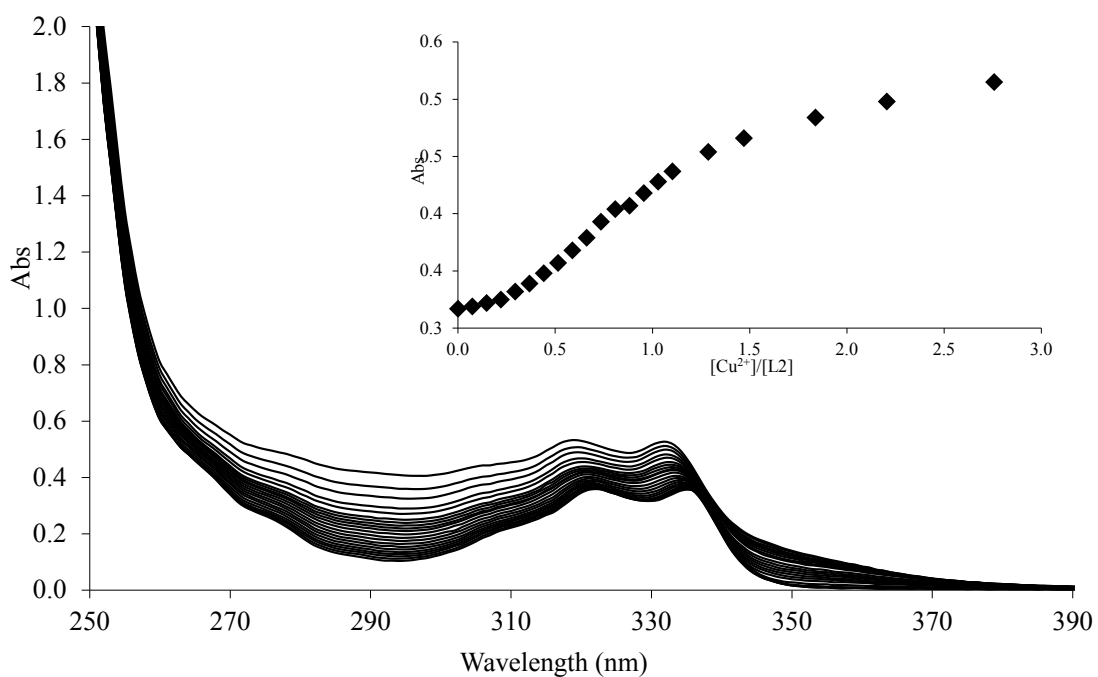

Figure S13. Absorption spectra of L2 in the presence of increasing amounts of Cu<sup>2+</sup> (inset: absorbance values measured at 335 nm versus [Cu<sup>2+</sup>]/[L2] molar ratio, [L2] = 1.99·10<sup>-5</sup> M, 25°C).

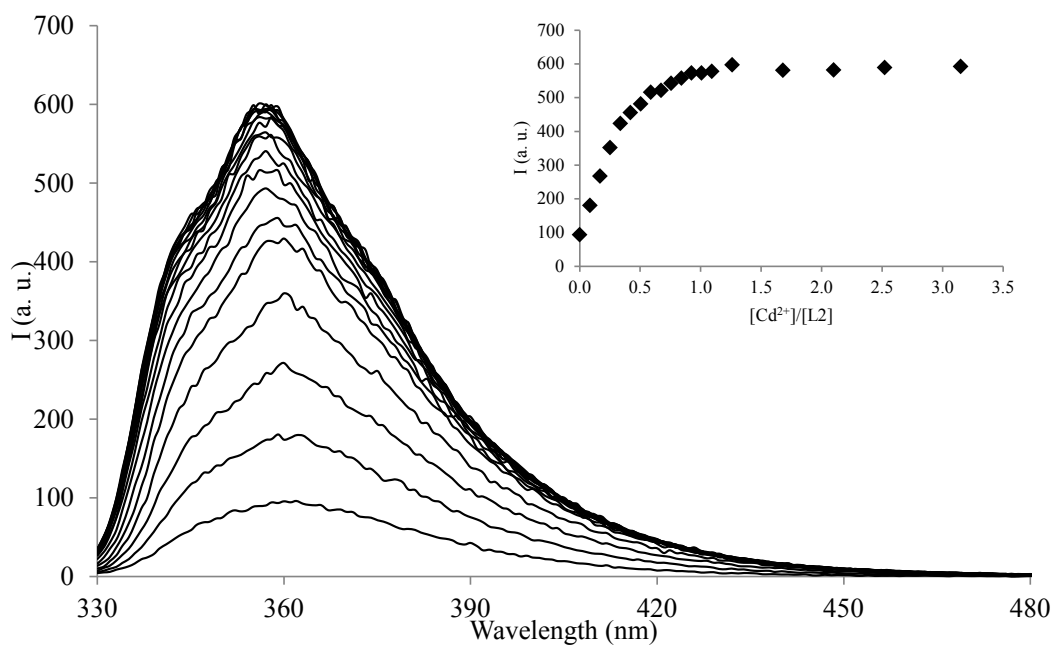

Figure S14. Changes in the emission spectrum of L2 upon addition of increasing amounts of  $\text{Cd}^{2+}$  (inset: emission values measured at 358 nm versus  $[\text{Cd}^{2+}]/[\text{L2}]$  molar ratio,  $[\text{L2}] = 1.99 \cdot 10^{-5} \text{ M}$ ,  $25^\circ\text{C}$ ,  $\lambda_{\text{ex}} = 323 \text{ nm}$ ).

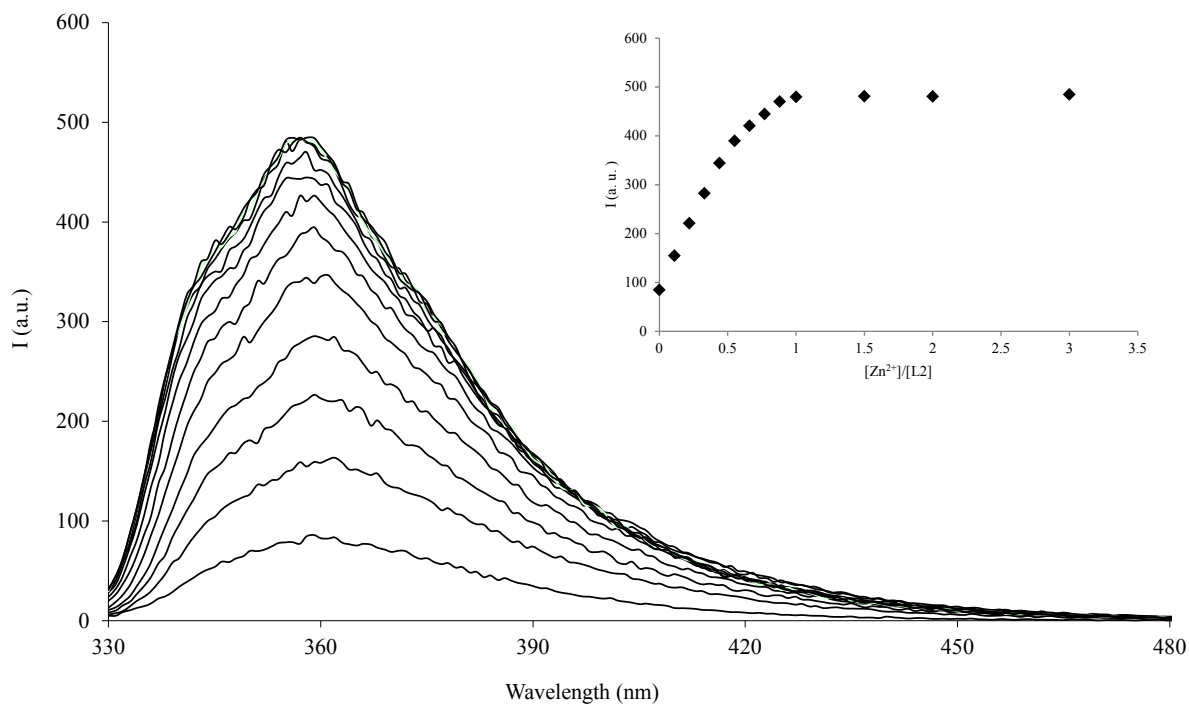

Figure S15. Changes in the emission spectrum of L2 upon addition of increasing amounts of  $\text{Zn}^{2+}$  (inset: emission values measured at 358 nm versus  $[\text{Zn}^{2+}]/[\text{L2}]$  molar ratio,  $[\text{L2}] = 1.99 \cdot 10^{-5} \text{ M}$ ,  $25^\circ\text{C}$ ,  $\lambda_{\text{ex}} = 323 \text{ nm}$ ).

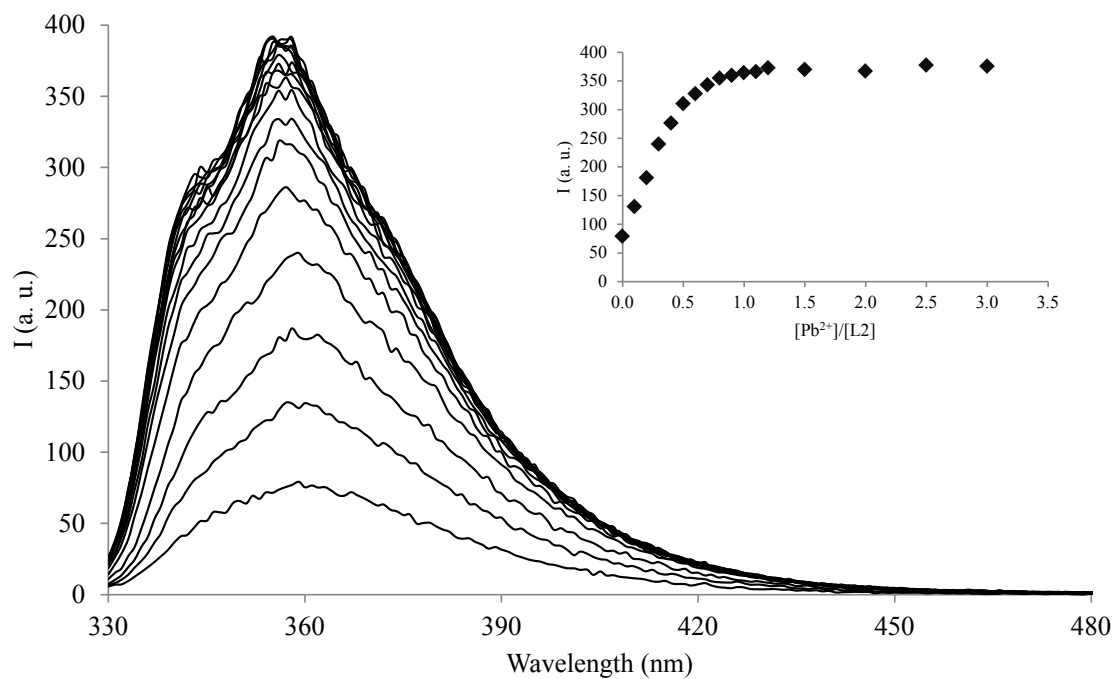

Figure S16. Changes in the emission spectrum of L2 upon addition of increasing amounts of  $\text{Pb}^{2+}$  (inset: emission values measured at 358 nm versus  $[\text{Pb}^{2+}]/[\text{L2}]$  molar ratio,  $[\text{L2}] = 1.99 \cdot 10^{-5} \text{ M}$ ,  $25^\circ\text{C}$ ,  $\lambda_{\text{ex}} = 323 \text{ nm}$ ).

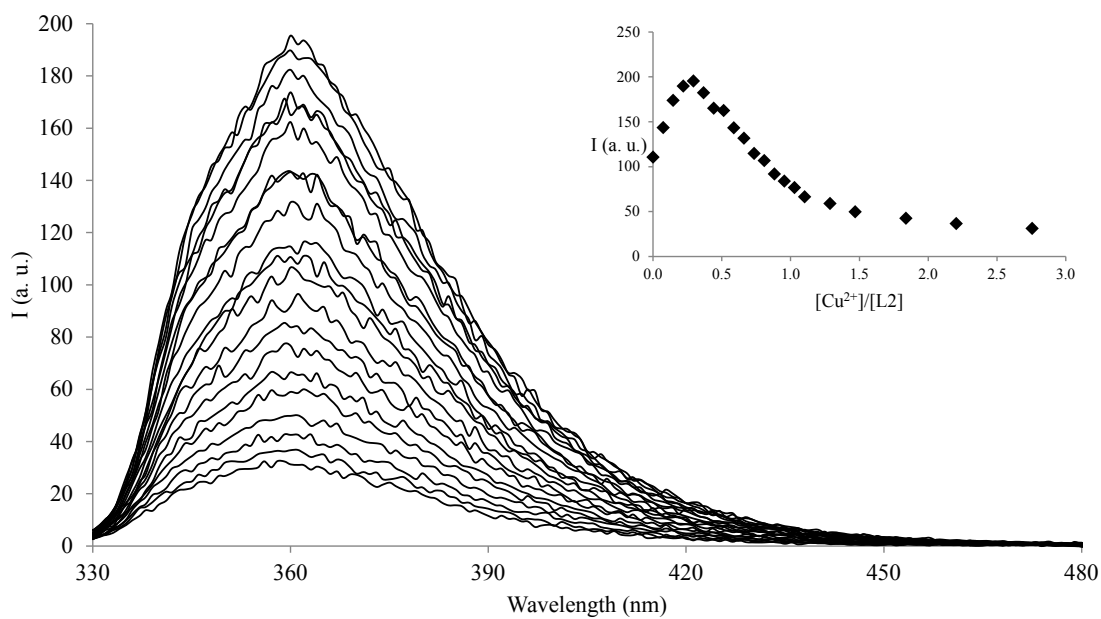

Figure S17. Changes in the emission spectrum of L2 upon addition of increasing amounts of  $\text{Cu}^{2+}$  (inset: emission values measured at 358 nm versus  $[\text{Cu}^{2+}]/[\text{L2}]$  molar ratio,  $[\text{L2}] = 1.99 \cdot 10^{-5} \text{ M}$ ,  $25^\circ\text{C}$ ,  $\lambda_{\text{ex}} = 323 \text{ nm}$ ).

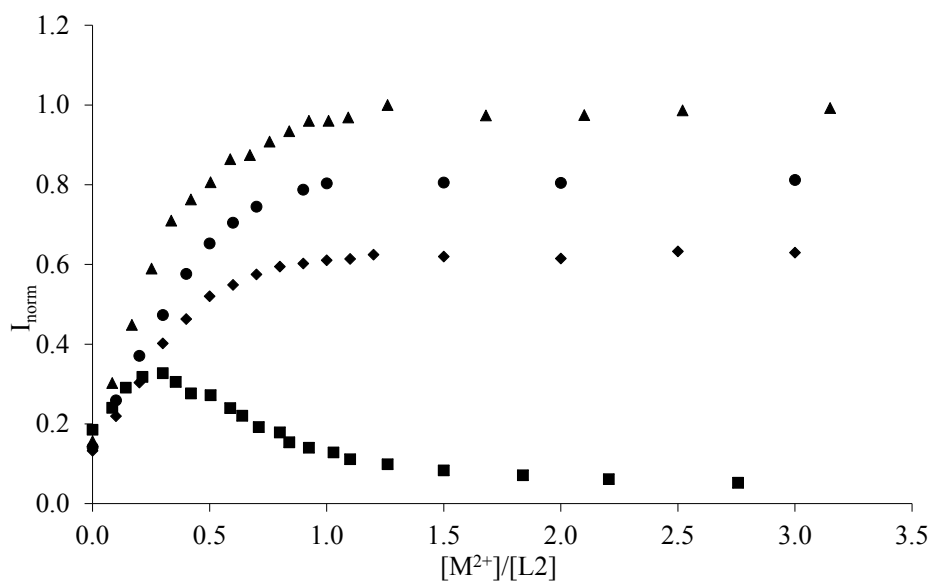

Figure S18. Normalized fluorescent intensity versus molar ratio plot for ligand L2 upon addition of increasing amounts of  $\text{Cd}^{2+}$  (▲),  $\text{Zn}^{2+}$  (●),  $\text{Pb}^{2+}$  (◆) and  $\text{Cu}^{2+}$  (■) ions ( $[L2] = 1.99 \cdot 10^{-5}$  M, MeCN/ $\text{H}_2\text{O}$  4:1 v/v, 25 °C,  $\lambda_{\text{ex}} = 323$ ,  $\lambda_{\text{em}} = 358$  nm).



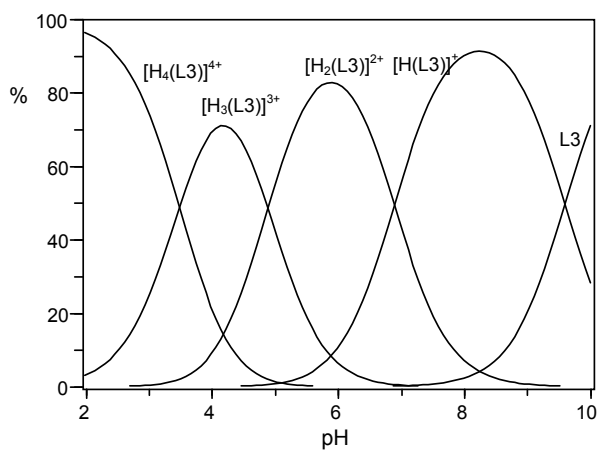

Figure S19. Distribution diagram of the protonated species of L3 ( $[L3] = 0.001 \text{ M}$ ,  $I = 0.1 \text{ M}$ ,  $25 \text{ }^\circ\text{C}$ )

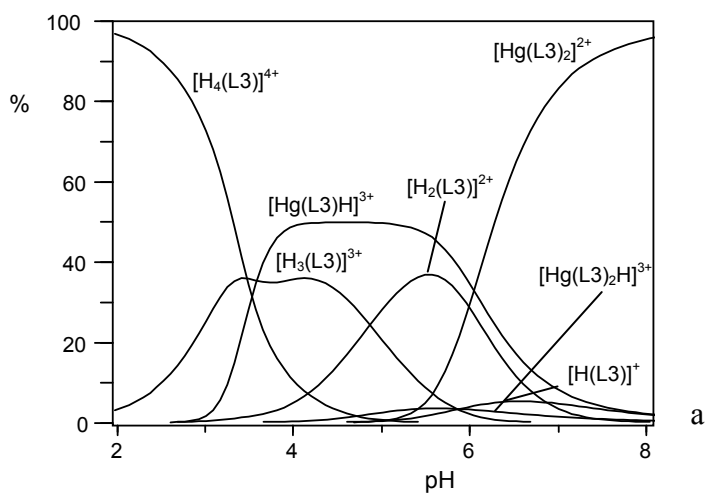

a

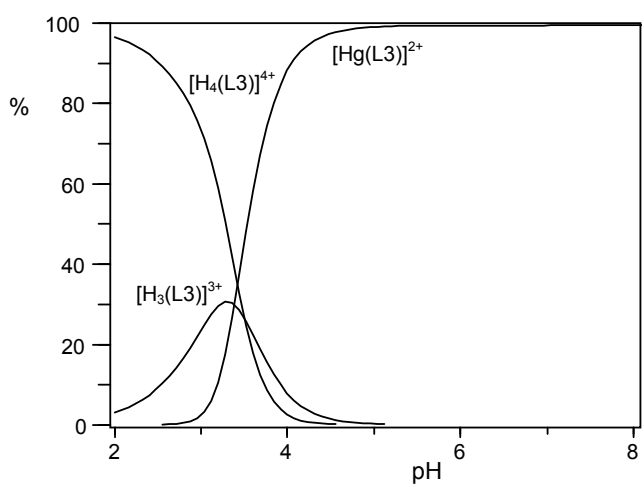

b

Figure S20. Distribution diagrams of the species formed by  $\text{Hg}^{2+}$  with L3 in metal to ligand molar ratio 1:2 a) and 1:1 b) ( $[\text{L3}] = 0.001 \text{ M}$ ,  $I = 0.1 \text{ M}$ ,  $25^\circ\text{C}$ ).

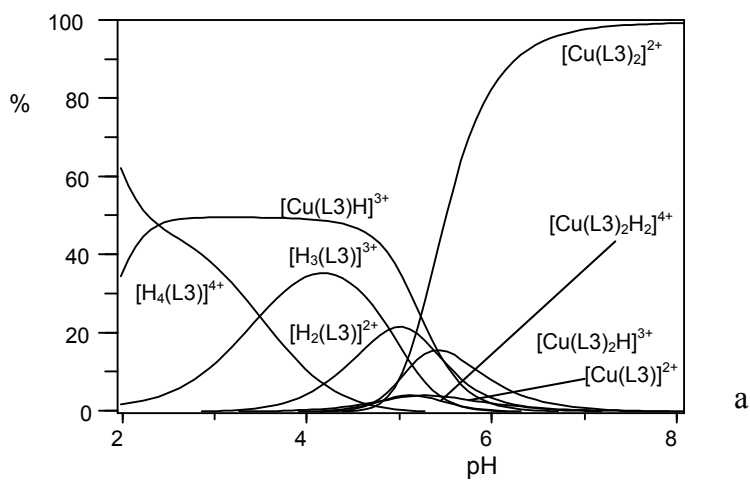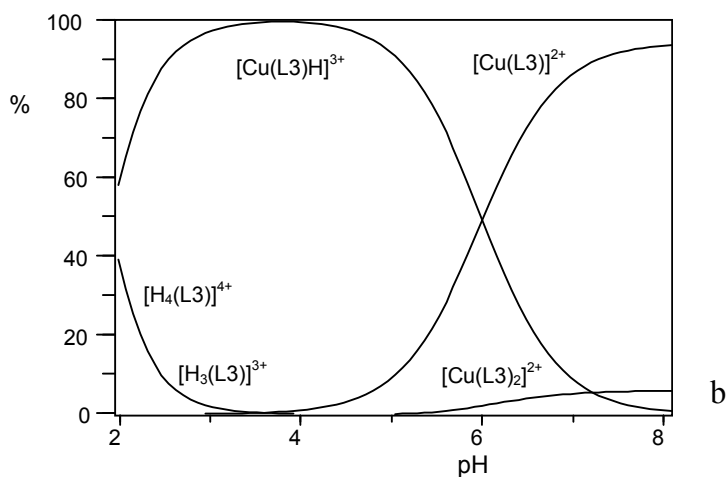

Figure S21. Distribution diagrams of the species formed by  $\text{Cu}^{2+}$  with L3 in metal to ligand molar ratio 1:2 a) and 1:1 b) ( $[\text{L3}] = 0.001 \text{ M}$ ,  $I = 0.1 \text{ M}$ ,  $25^\circ\text{C}$ ).

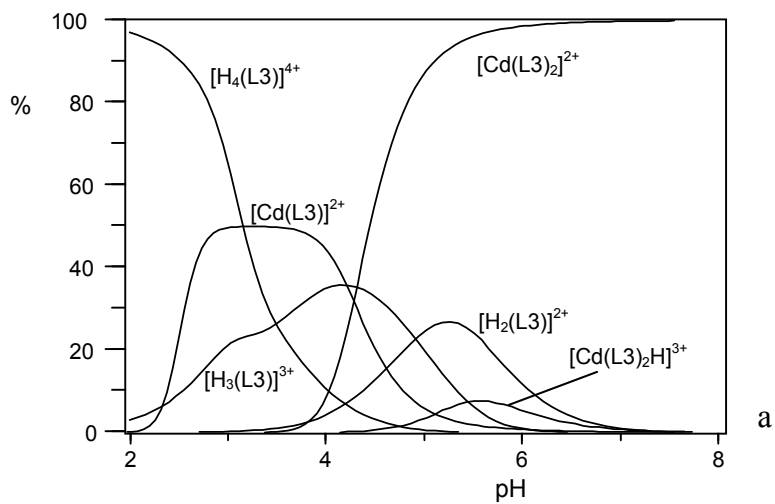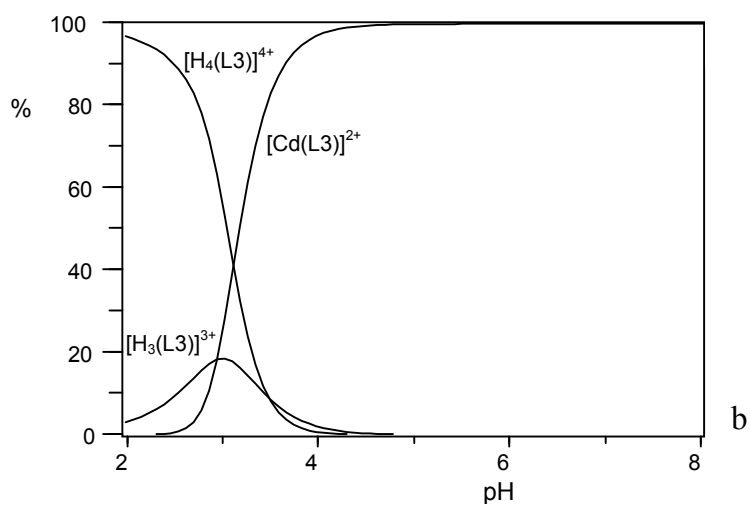

Figure S22. Distribution diagrams of the species formed by  $Cd^{2+}$  with L3 in metal to ligand molar ratio 1:2 a) and 1:1 b) ( $[L_3] = 0.001$  M,  $I = 0.1$  M,  $25^\circ C$ ).

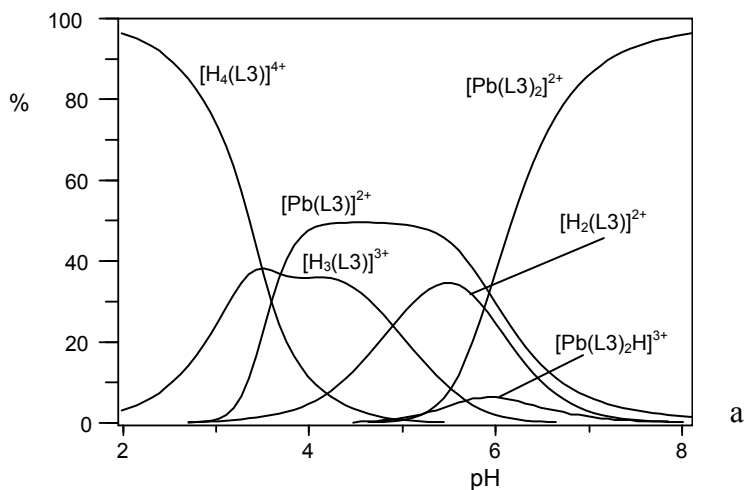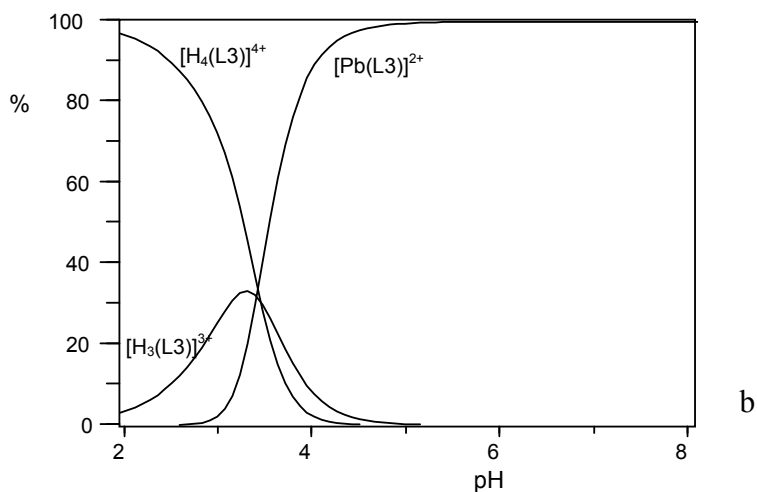

Figure S23. Distribution diagrams of the species formed by  $\text{Pb}^{2+}$  with L3 in metal to ligand molar ratio 1:2 a) and 1:1 b) ( $[\text{L3}] = 0.001 \text{ M}$ ,  $I = 0.1 \text{ M}$ ,  $25^\circ\text{C}$ ).

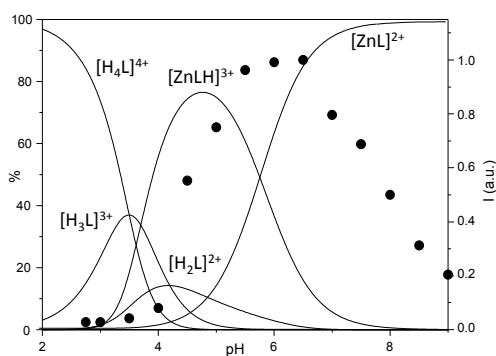

a)

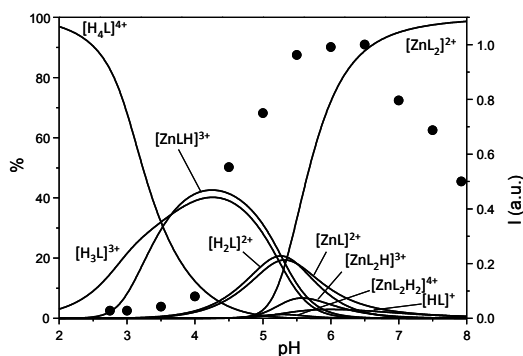

b)

Figure S24. Superimposition of the fluorescence emission intensity at 505 nm (right, y axis) with the distribution diagrams of the species formed by L3 in the presence of  $\text{Zn}^{2+}$  in a) 1:1 e b) 2:1 molar ratio (left, y axis,  $[\text{L3}] = 1.95 \times 10^{-5} \text{ M}$ ). The decrease of the emission intensity above pH 7 can be ascribed to the formation of minor percentages of scarcely emissive hydroxo complexes.

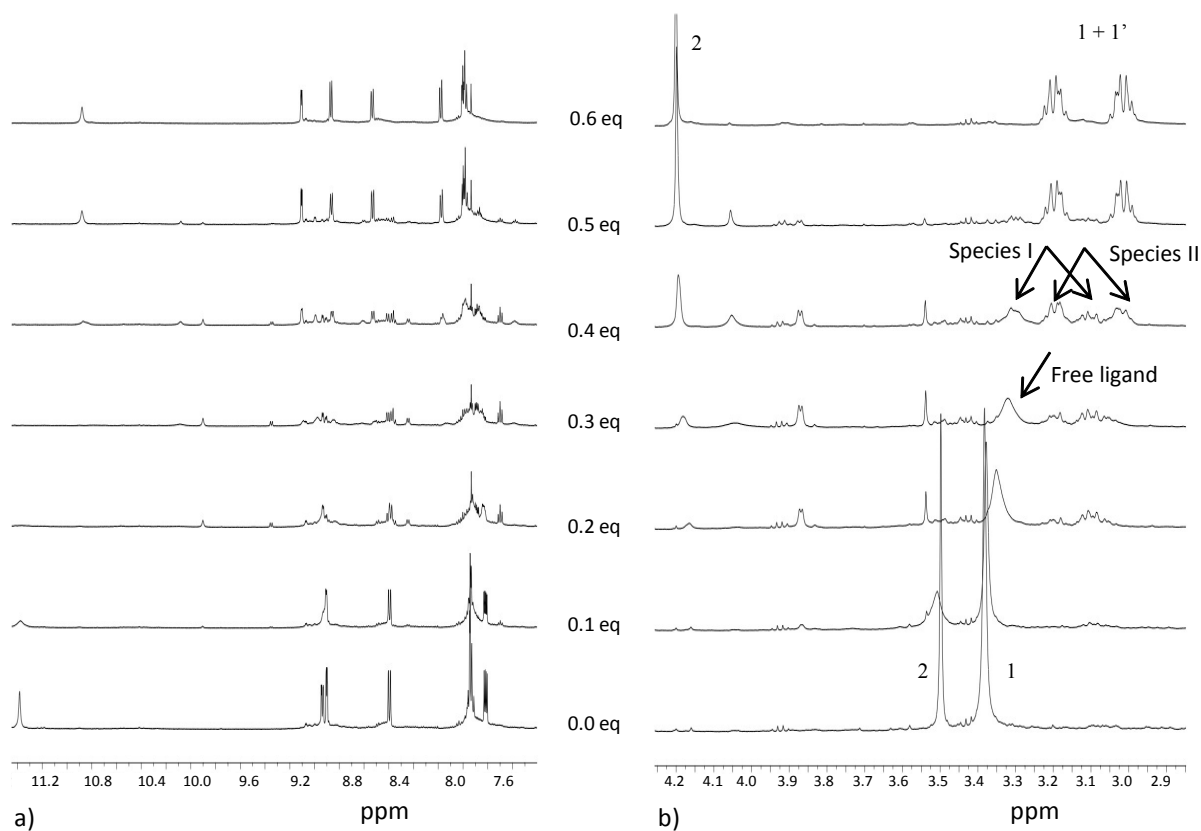

Figure S25. a) High and b) low frequency regions of the  $^1\text{H-NMR}$  spectra of L3 in the presence of different amounts of  $\text{Zn}^{2+}$ . For the numbering scheme see Table 2.

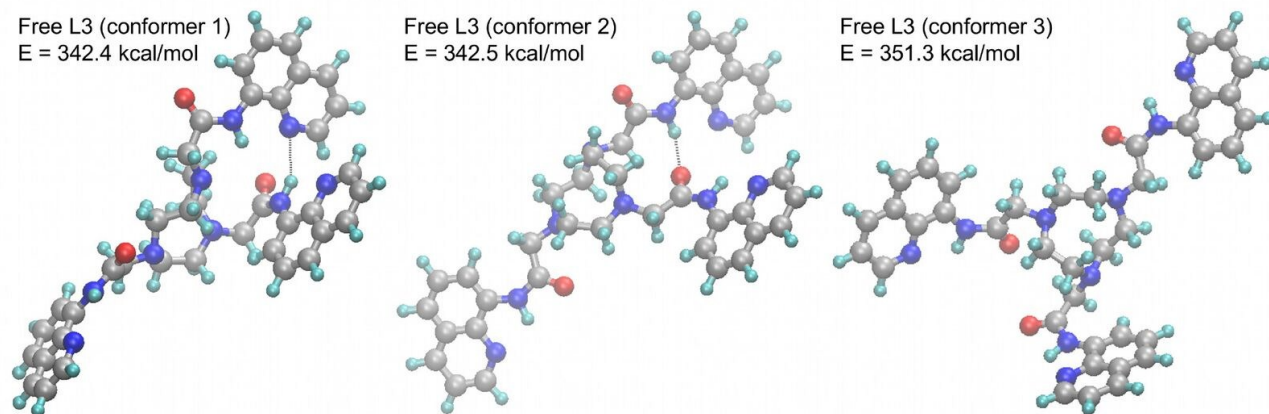

Figure S26. The three conformers with the lowest potential energy are shown (balls-and-sticks style) for L3 in the absence of any metal ion. The corresponding energy is reported in kcal/mol. Atoms are colour coded as: C (grey), H (cyan), N (blue) and O (red). Hydrogen-bonds are shown with dotted lines.

[L3Zn]<sup>2+</sup> (Donors: 3 N + 0 O)  
E = 241.6 kcal/mol

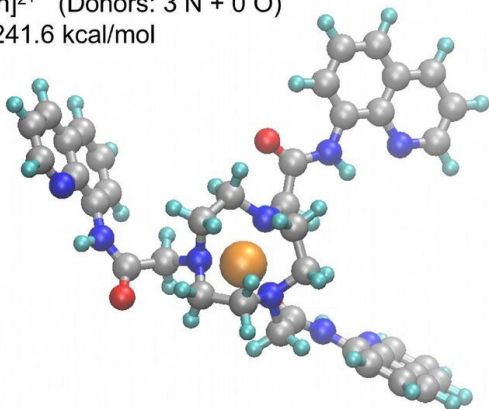

[L3Zn]<sup>2+</sup> (Donors: 3 N + 1 O)  
E = 151.6 kcal/mol

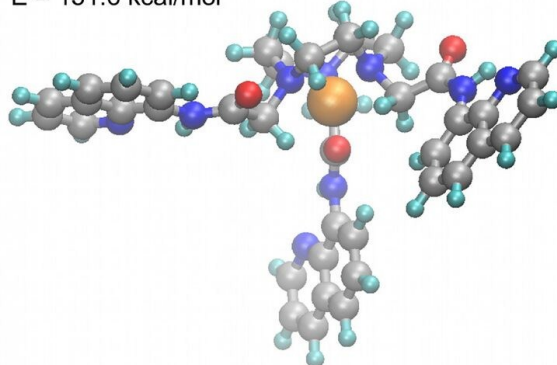

[L3Zn]<sup>2+</sup> (Donors: 3 N + 2 O)  
E = 107.6 kcal/mol

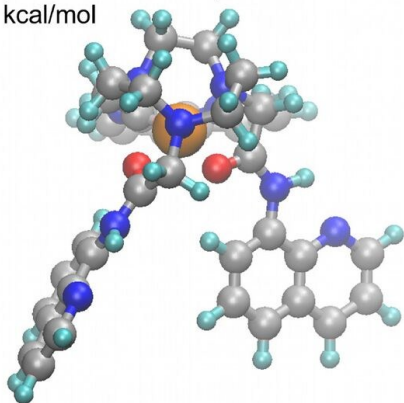

[L3Zn]<sup>2+</sup> (Donors: 3 N + 3 O)  
E = 288.0 kcal/mol

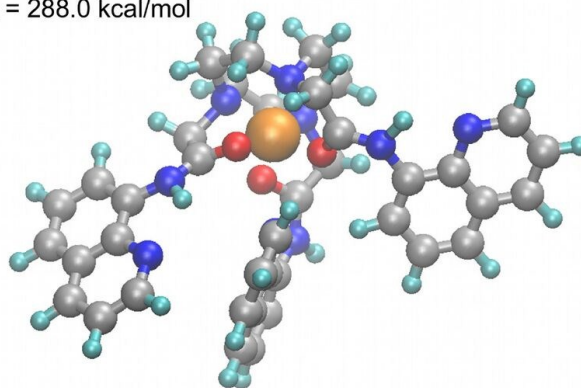

Figure S27. The lowest energy conformer is shown (balls-and-sticks style) for L3 in the presence of Zn<sup>2+</sup>. A different number of donors was considered in each case: 3 N (top-left), 3 N + 1 O (top-right), 3 N + 2 O (bottom-left) and 3 N + 3 O (bottom-right). The corresponding energy is reported in kcal/mol. Atoms are colour coded as: C (grey), H (cyan), N (blue) and O (red).

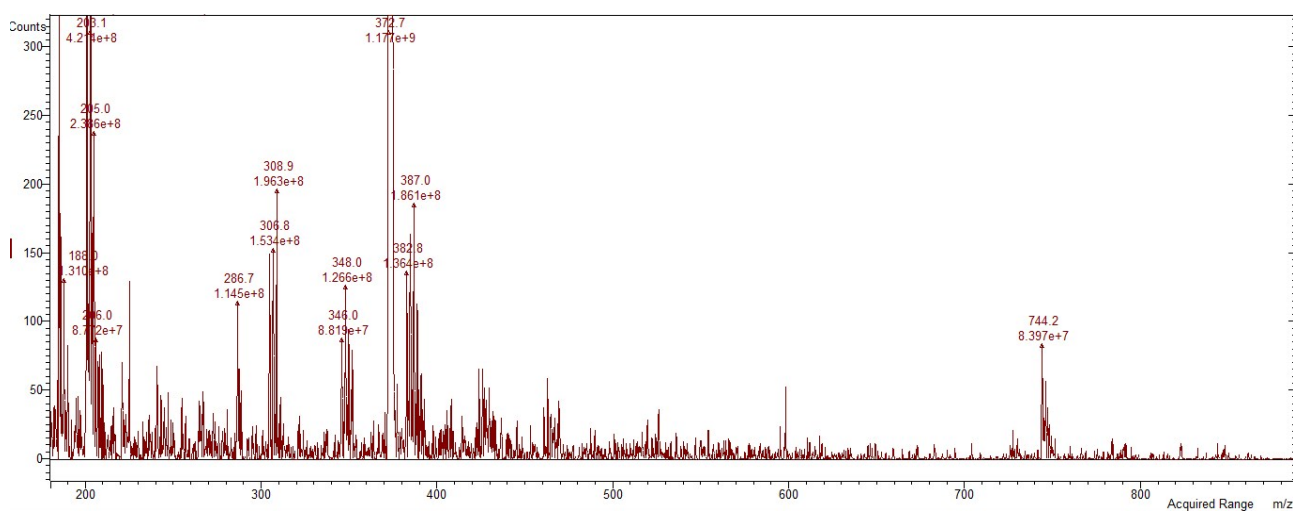

Figure S28. ESI-MS spectrum of a solution of L3 and Zn<sup>2+</sup> at molar ratio Zn<sup>2+</sup>/L3 of 1.0 ([L3] = 0.001 M, MeCN/CHCl<sub>3</sub> 70:30 (v/v)).

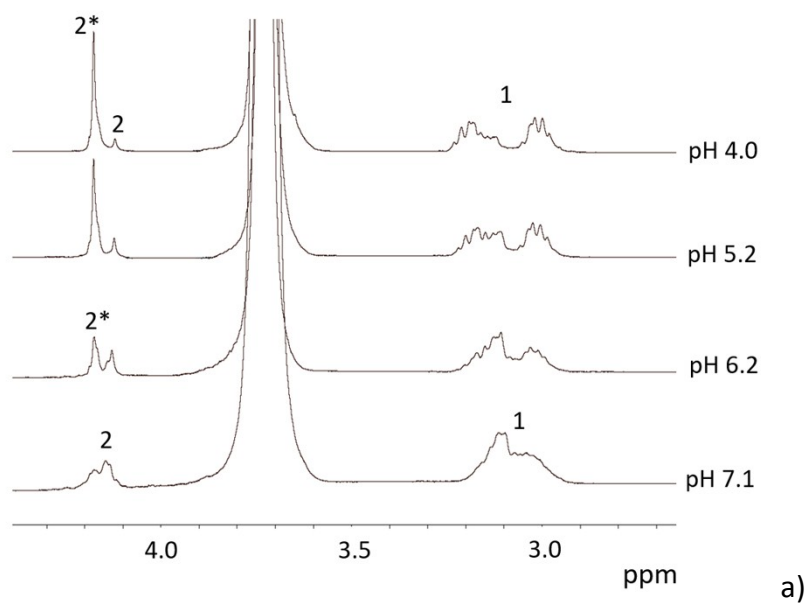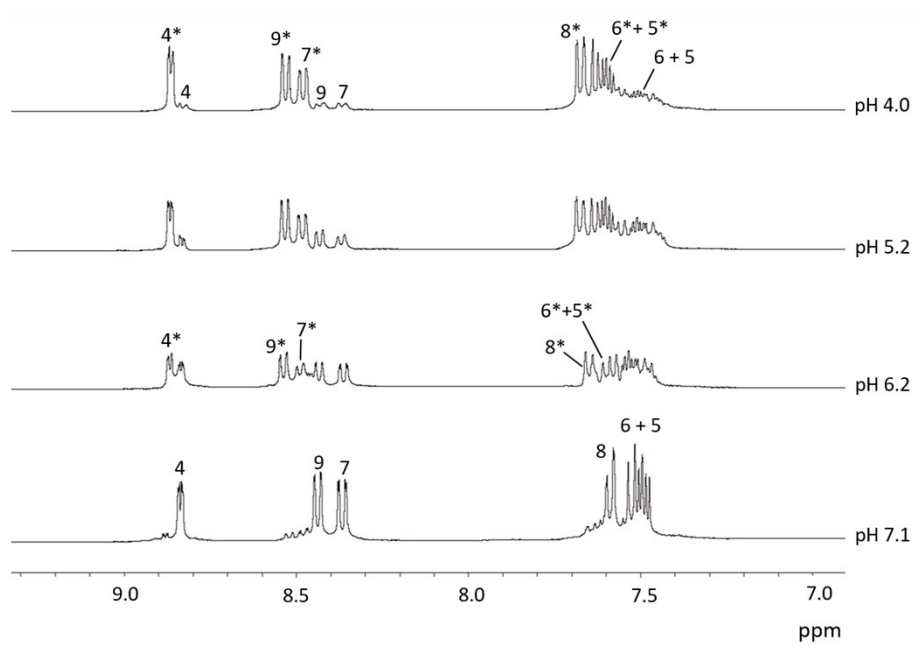

Figure S29. a) Low and b) high frequency regions of the  $^1\text{H}$ -NMR spectra of L3 at different pH values in  $\text{CD}_3\text{CN}:\text{D}_2\text{O}$  1:1 v/v (signals labelled with an asterisk can be attributed to the protonated  $[\text{ZnL3H}]^{3+}$  complex).

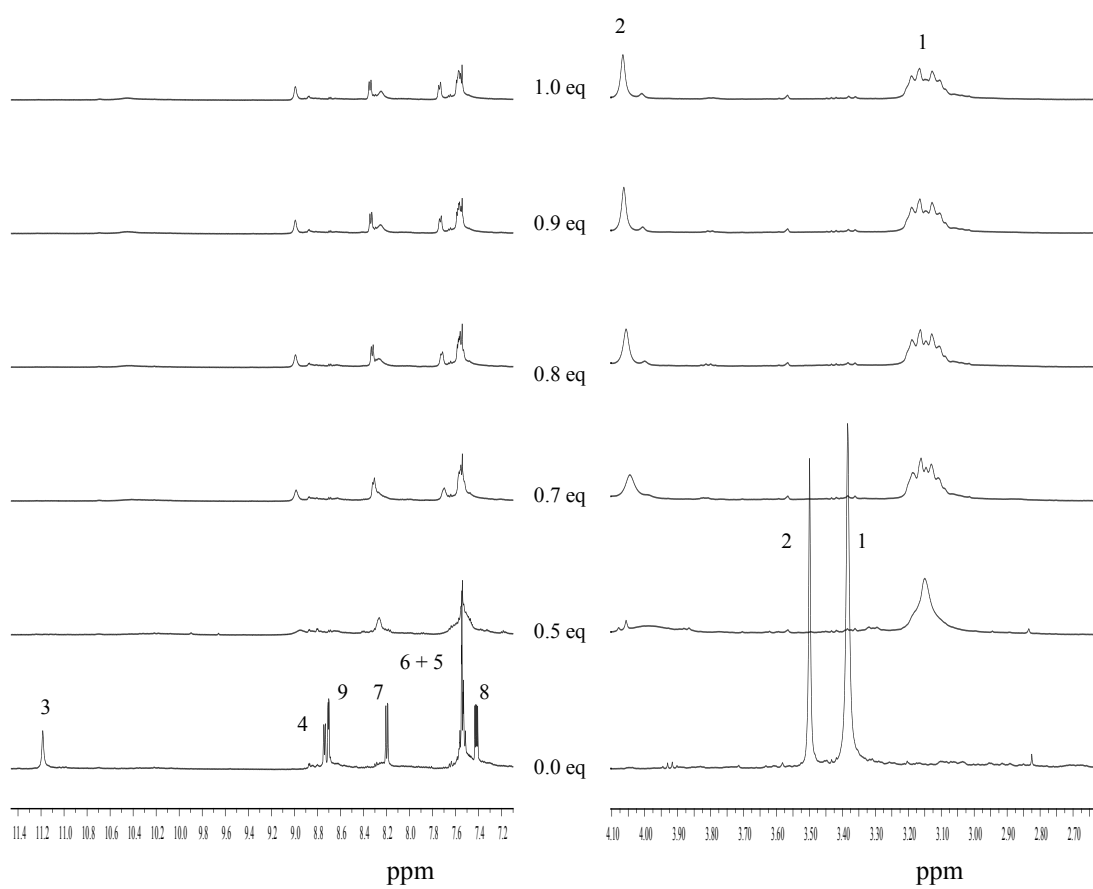

a)

b)

Figure S30. a) Low and b) high frequency regions of the  $^1\text{H-NMR}$  spectra of L3 in the presence of different amounts of  $\text{Hg}^{2+}$ . For the numbering scheme see Table 2.



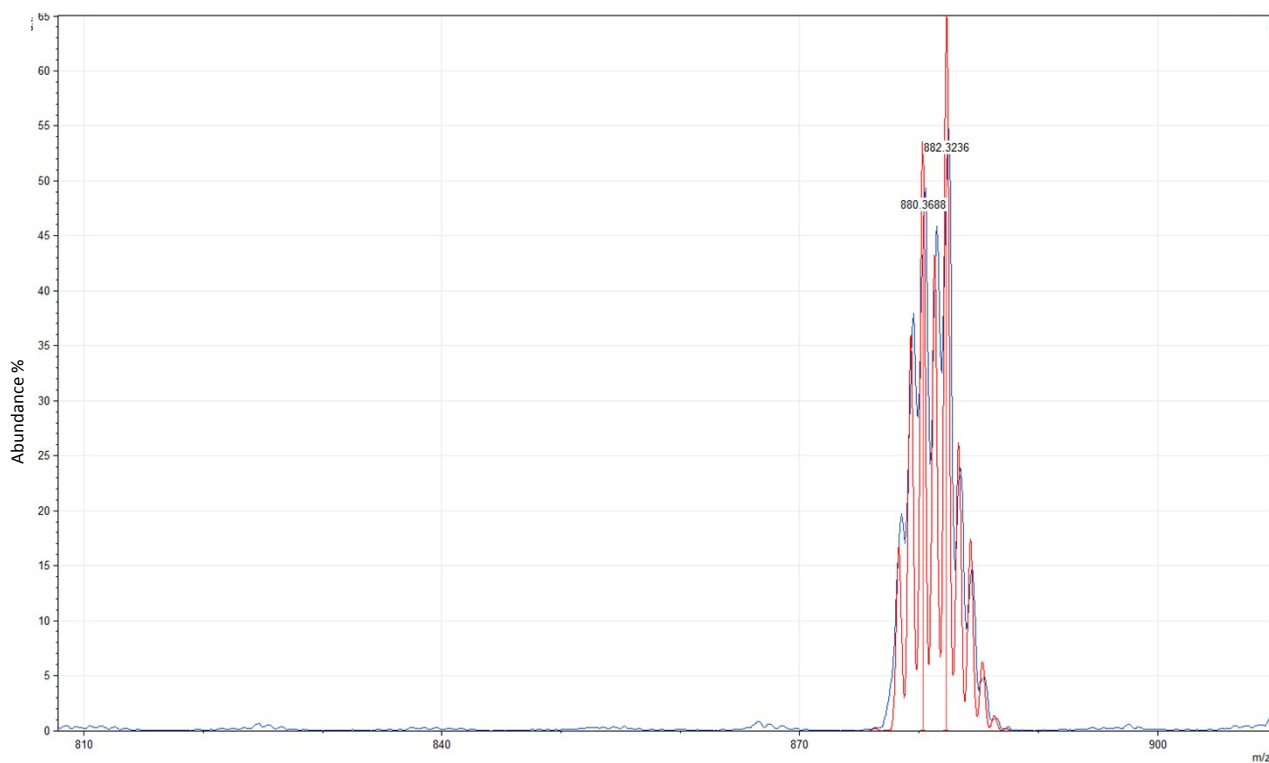

Figure S31. ESI-MS spectrum at molar ratio  $\text{Hg}^{2+}/\text{L3}$  of 1.0 ( $[\text{L3}] = 0.001 \text{ M}$ ,  $\text{MeCN}/\text{CHCl}_3$  70:30 (v/v)).

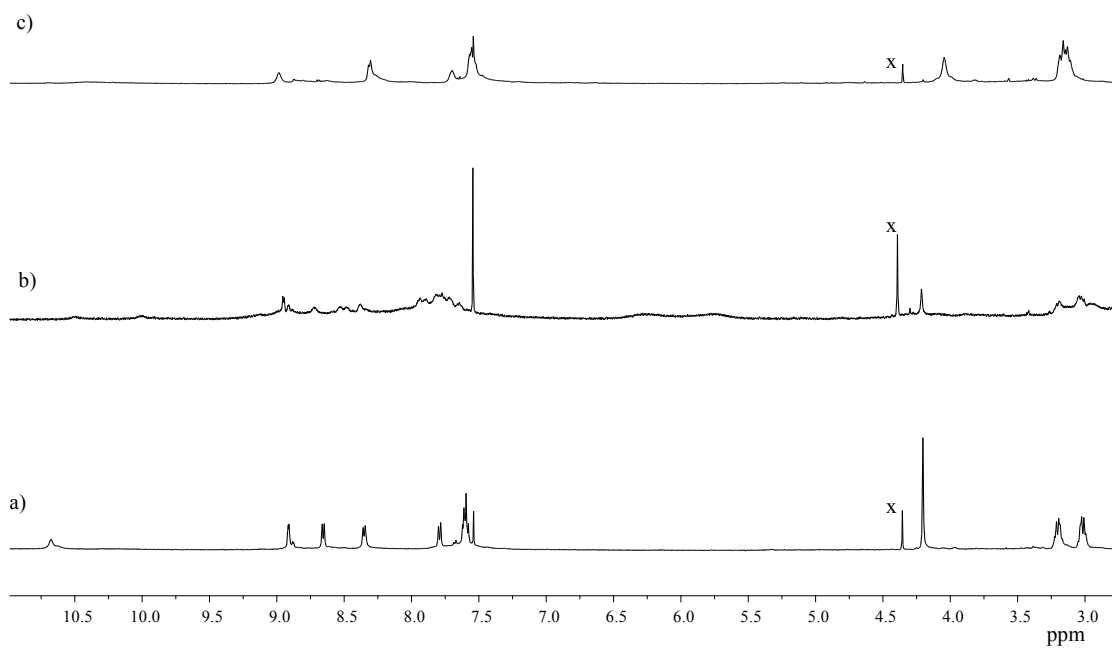

Figure S32.  $^1\text{H-NMR}$  spectra of a) solution of L3 and  $\text{Zn}^{2+}$  at molar ratio  $\text{Zn}^{2+}/\text{L3}$  of 1.0, b) solution of L3 and  $\text{Zn}^{2+}$  in 1:1 molar ratio and addition of 1 equiv. of  $\text{Hg}^{2+}$  and c) solution of L3 and  $\text{Hg}^{2+}$  at molar ratio  $\text{Hg}^{2+}/\text{L3}$  of 1.0. (X = impurities).

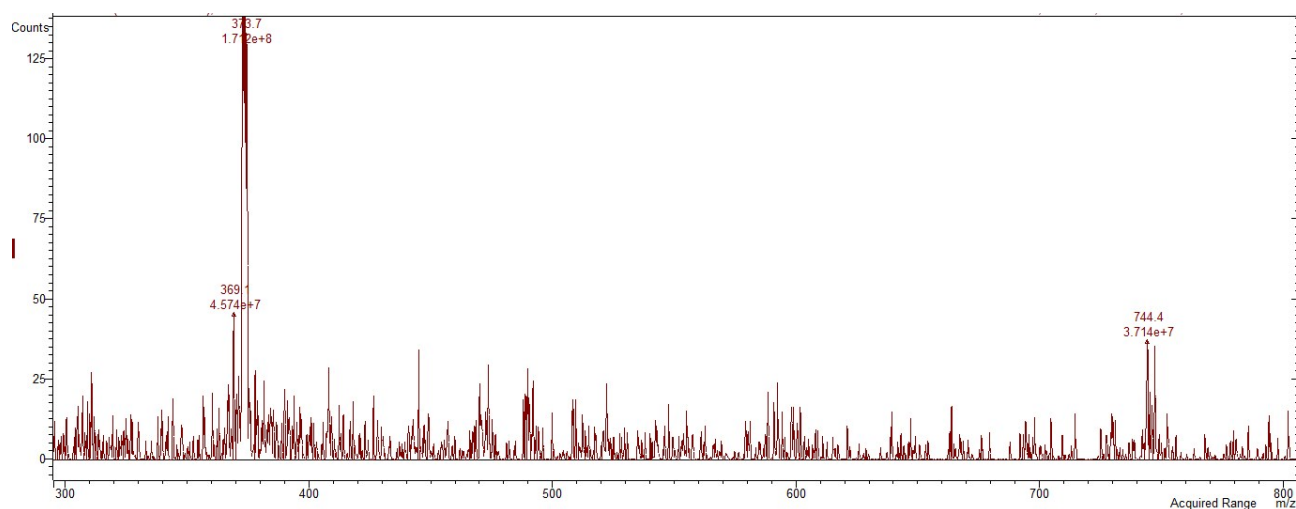

Figure S33. ESI-MS spectrum of a solution of L3 and Zn<sup>2+</sup> in 1:1 molar ratio and addition of 1 equiv. of Hg<sup>2+</sup> ([L3]= 0.001 M, MeCN/CHCl<sub>3</sub> 70:30 (v/v)).

Table S2. Summary of the basic crystallographic parameters for [ZnL1(Ac)](Ac) (1), [CuL1(Cl)](Cl)·H<sub>2</sub>O (2) and [CuL3](NO<sub>3</sub>) (3)

|                                                        | 1                                                                                                              | 2                                                                                 | 3                                                                |
|--------------------------------------------------------|----------------------------------------------------------------------------------------------------------------|-----------------------------------------------------------------------------------|------------------------------------------------------------------|
| Empirical formula                                      | C <sub>35</sub> H <sub>48</sub> N <sub>9</sub> O <sub>5</sub> Zn, C <sub>2</sub> H <sub>3</sub> O <sub>2</sub> | C <sub>33</sub> H <sub>46</sub> Cl <sub>2</sub> CuN <sub>9</sub> O <sub>3.5</sub> | C <sub>39</sub> H <sub>38</sub> CuN <sub>10</sub> O <sub>6</sub> |
| Formula weight                                         | 799.24                                                                                                         | 759.23                                                                            | 806.34                                                           |
| Crystal system                                         | triclinic                                                                                                      | triclinic                                                                         | orthorhombic                                                     |
| Space group                                            | P-1                                                                                                            | P-1                                                                               | Pbca                                                             |
| a / Å                                                  | 10.757(4)                                                                                                      | 10.2504(4)                                                                        | 16.8909(3)                                                       |
| b / Å                                                  | 11.917(4)                                                                                                      | 12.2470(5)                                                                        | 10.8298(3)                                                       |
| c / Å                                                  | 14.635(5)                                                                                                      | 15.0718(6)                                                                        | 39.2281(14)                                                      |
| α / °                                                  | 88.72(3)                                                                                                       | 73.311(4)                                                                         | 90                                                               |
| β / °                                                  | 85.72(3)                                                                                                       | 76.050(3)                                                                         | 90                                                               |
| γ / °                                                  | 87.84(3)                                                                                                       | 88.129(3)                                                                         | 90                                                               |
| V / Å <sup>3</sup>                                     | 1869.2(11)                                                                                                     | 1757.55(12)                                                                       | 7175.8(4)                                                        |
| T / K                                                  | 295(2)                                                                                                         | 150(2)                                                                            | 120(2)                                                           |
| Z                                                      | 2                                                                                                              | 2                                                                                 | 8                                                                |
| Reflections collected                                  | 19785                                                                                                          | 16826                                                                             | 30968                                                            |
| Independent reflections                                | 7511 [R <sub>int</sub> = 0.023]                                                                                | 6826 [R <sub>int</sub> = 0.027]                                                   | 7048 [R <sub>int</sub> = 0.0460]                                 |
| Absorption correction                                  | multi-scan                                                                                                     | analytical                                                                        | gaussian                                                         |
| Max. / min. transmission                               | 1.000 / 0.764                                                                                                  | 0.924 / 0.662                                                                     | 0.786 / 0.896                                                    |
| Refinement method                                      | Full-matrix least-squares on F <sup>2</sup>                                                                    | Full-matrix least-squares on F <sup>2</sup>                                       | Full-matrix least-squares on F <sup>2</sup>                      |
| Data / restraints / parameters                         | 7511 / 147 / 460                                                                                               | 6826 / 0 / 442                                                                    | 7048 / 507 / 505                                                 |
| Goodness-of-fit on F <sup>2</sup>                      | 1.087                                                                                                          | 1.04                                                                              | 1.188                                                            |
| Final R indices [F <sup>2</sup> > 2σ(F <sup>2</sup> )] | R1 = 0.0375,<br>wR2 = 0.1039                                                                                   | R1 = 0.0373,<br>wR2 = 0.0943                                                      | R1 = 0.0981,<br>wR2 = 0.2177                                     |
| R indices (all data)                                   | R1 = 0.0483,<br>wR2 = 0.1065                                                                                   | R1 = 0.0463,<br>wR2 = 0.101                                                       | R1 = 0.1031,<br>wR2 = 0.2196                                     |

| Table S3. Selected Bond Distances (Å) and Angles (°) for [ZnL1(Ac)](Ac) (1), [CuL1(Cl)](Cl)·H <sub>2</sub> O (2) and [CuL3](NO <sub>3</sub> ) (3). |            |            |           |
|----------------------------------------------------------------------------------------------------------------------------------------------------|------------|------------|-----------|
|                                                                                                                                                    | 1          | 2          | 3         |
| M1-N1                                                                                                                                              | 2.0983(18) | 2.2200(18) | 1.928(5)  |
| M1-N2                                                                                                                                              |            |            | 2.057(5)  |
| M1-N3                                                                                                                                              |            |            | 2.081(5)  |
| M1-N4                                                                                                                                              | 2.2318(19) | 2.019(17)  | 2.044(5)  |
| M1-N7                                                                                                                                              | 2.1048(19) | 2.1159(18) | 2.353(5)  |
| M1-N41                                                                                                                                             |            | 2.1686(18) |           |
| M1-O1                                                                                                                                              | 2.1473(17) |            | 2.609(5)  |
| M1-O3S                                                                                                                                             | 2.1179(18) |            |           |
| M1-O4S                                                                                                                                             | 2.0889(18) |            |           |
| M1-Cl1                                                                                                                                             |            | 2.2290(5)  |           |
|                                                                                                                                                    |            |            |           |
|                                                                                                                                                    |            |            |           |
|                                                                                                                                                    |            |            |           |
| N1-M1-N2                                                                                                                                           |            |            | 82.7(2)   |
| N1-M1-N3                                                                                                                                           |            |            | 165.7(2)  |
| N1-M1-N4                                                                                                                                           | 82.24(7)   | 85.42(7)   | 81.8(2)   |
| N1-M1-N7                                                                                                                                           | 85.23(7)   | 84.08(7)   | 100.6(2)  |
| N1-M1-N41                                                                                                                                          |            | 106.37(7)  |           |
| N2-M1-N4                                                                                                                                           |            |            | 164.5(2)  |
| N2-M1-N3                                                                                                                                           |            |            | 85.3(2)   |
| N2-M1-N7                                                                                                                                           |            |            | 82.67(19) |
| N3-M1-N4                                                                                                                                           |            |            | 110.30(2) |
| N3-M1-N7                                                                                                                                           |            |            | 80.99(18) |
| N4-M1-N7                                                                                                                                           | 81.93(7)   | 85.12(7)   | 99.21(18) |
| N4-M1-N41                                                                                                                                          |            | 83.42(7)   |           |
| N7-M1-N41                                                                                                                                          |            | 163.76(7)  |           |
| N1-M1-O1                                                                                                                                           | 93.39(7)   |            | 106.5(2)  |
| N1-M1-O3S                                                                                                                                          | 166.53(7)  |            |           |
| N1-M1-O4S                                                                                                                                          | 106.23(7)  |            |           |
| N2-M1-O1                                                                                                                                           |            |            | 96.2(2)   |
| N3-M1-O1                                                                                                                                           |            |            | 71.6(2)   |
| N4-M1-O1                                                                                                                                           | 169.60(6)  |            | 89.1(2)   |
| N4-M1-O3S                                                                                                                                          | 95.19(7)   |            |           |
| N4-M1-O4S                                                                                                                                          | 98.92(7)   |            |           |
| N7-M1-O1                                                                                                                                           | 88.32(7)   |            | 152.5(2)  |
| N7-M1-O3S                                                                                                                                          | 107.57(7)  |            |           |
| N7-M1-O4S                                                                                                                                          | 168.53(7)  |            |           |
| O1-M1-O3S                                                                                                                                          | 91.18(7)   |            |           |
| O1-M1-O4S                                                                                                                                          | 91.36(7)   |            |           |
| O3S-M1-O4S                                                                                                                                         | 60.97(7)   |            |           |
| N1-M1-Cl1                                                                                                                                          |            | 104.48(5)  |           |
| N4-M1-Cl1                                                                                                                                          |            | 167.98(7)  |           |
| N7-M1-Cl1                                                                                                                                          |            | 94.31(5)   |           |
| N41-M1-Cl1                                                                                                                                         |            | 94.99(5)   |           |
